# 1           **A global meta-analysis reveals higher variation in breeding** 2           **phenology in urban birds than in their non-urban neighbours**

## 3   **Authors:**

4 Pablo Capilla-Lasheras<sup>1#</sup>, Megan J. Thompson<sup>2,3</sup>, Alfredo Sánchez-Tójar<sup>4</sup>, Yacob Haddou<sup>1</sup>,  
5 Claire J. Branston<sup>1</sup>, Denis Réale<sup>2</sup>, Anne Charmantier<sup>3</sup>, Davide M. Dominoni<sup>1</sup>

## 6   **Affiliations:**

7   <sup>1</sup> School of Biodiversity, One Health and Veterinary Medicine, University of Glasgow,  
8 Glasgow, Scotland

9   <sup>2</sup> Département des Sciences Biologiques, Université du Québec à Montréal, Canada

10   <sup>3</sup> Centre d'Ecologie Fonctionnelle et Evolutive, Université de Montpellier, CNRS, EPHE, IRD,  
11 Montpellier, France

12   <sup>4</sup> Department of Evolutionary Biology, Bielefeld University, Bielefeld, Germany.

13   # Corresponding author: [pacapilla@gmail.com](mailto:pacapilla@gmail.com) (PC-L)

14   PC-L: [pacapilla@gmail.com](mailto:pacapilla@gmail.com); MJT: [thompsonjoymegan@gmail.com](mailto:thompsonjoymegan@gmail.com);

15   AS-T: [alfredo.tojar@gmail.com](mailto:alfredo.tojar@gmail.com); YH: [Yacob.Haddou@glasgow.ac.uk](mailto:Yacob.Haddou@glasgow.ac.uk);

16   CJB: [Claire.Branston@glasgow.ac.uk](mailto:Claire.Branston@glasgow.ac.uk); DR: [reale.denis@uqam.ca](mailto:reale.denis@uqam.ca);

17   AC: [anne.charmantier@cefe.cnrs.fr](mailto:anne.charmantier@cefe.cnrs.fr); DMD: [Davide.Dominoni@glasgow.ac.uk](mailto:Davide.Dominoni@glasgow.ac.uk)

18   **Running title:** Higher phenotypic variation in urban birds

19   **Keywords:** urban ecology, urbanisation, phenotypic variation, life-history traits, habitat  
20 heterogeneity, global change, meta-analysis, synthesis

21   **Article type:** Synthesis

## 22   **Author contributions**

23 PC-L, MJT, DR, AC and DMD conceived the study. PC-L, AS-T, CJB and DMD performed the  
24 literature search. PC-L extracted effect sizes from suitable published papers. MJT validated  
25 effect size extraction. PC-L and YH performed all statistical analysis with advice from AS-T.  
26 PC-L wrote the first draft of the manuscript with input from MJT, AS-T, DR, AC and DMD. All  
27 authors read and revised the manuscript.

## 28   **Data availability**

29 All R scripts and datasets needed to reproduce the analyses presented in this paper are  
30 available at: [https://github.com/PabloCapilla/meta-analysis\\_variation\\_urban](https://github.com/PabloCapilla/meta-analysis_variation_urban). Should the  
31 manuscript be accepted, a DOI to this data repository will be provided.

32 **Words in abstract:** 200

33 **Words in main text:** 7500

34 **Number of references:** 142

35 **Number of figures:** 4

36 **Number of tables:** 2

37 **Number of text boxes:** 0

38

## 39 **Abstract**

40 Cities pose a major ecological challenge for wildlife worldwide. Phenotypic variation, which  
41 can result from underlying genetic variation or plasticity, is an important metric to understand  
42 eco-evolutionary responses to environmental change. Recent work suggests that urban  
43 populations might have higher levels of phenotypic variation than non-urban counterparts.  
44 This prediction, however, has never been tested across species nor over a broad geographical  
45 range. Here, we conduct a meta-analysis of the avian literature to compare urban *versus* non-  
46 urban means and variation in phenology (i.e., lay date) and reproductive effort (i.e., clutch  
47 size, number of fledglings). First, we show that urban populations reproduce earlier and have  
48 smaller broods than non-urban conspecifics. Second, we show that urban populations have  
49 higher phenotypic variation in laying date than non-urban populations. This result arises from  
50 differences between populations within breeding seasons, conceivably due to higher  
51 landscape heterogeneity in urban habitats. These findings reveal a novel effect of urbanisation  
52 on animal life-histories with potential implications for species adaptation to urban  
53 environments (which will require further investigation). Higher variation in phenology in birds  
54 subjected to urban disturbance could result from plastic responses to a heterogeneous  
55 environment, or from higher genetic variation in phenology, possibly linked to higher  
56 evolutionary potential.

## 57 Introduction

58 Humans have drastically changed environmental conditions on Earth, particularly since the  
59 invention of agriculture during the Neolithic Revolution. The footprint of human activity is most  
60 pronounced in urban environments, where microclimatic conditions, biogeochemical cycles  
61 and sensory landscapes are considerably different from those in non-urban habitats (Grimm  
62 *et al.* 2008). Perhaps not surprisingly, multiple shifts in animal and plant phenotypes have  
63 been associated with the novel conditions and selective pressures found in cities (Hendry *et*  
64 *al.* 2017). Indeed, numerous studies have reported divergent phenotypes between urban and  
65 non-urban populations in phenological, morphological, behavioural and reproductive traits  
66 (e.g., Alberti *et al.* 2017; Diamond *et al.* 2018; Campbell-Staton *et al.* 2020; reviewed in  
67 Johnson & Munshi-South 2017; Lambert *et al.* 2020; Diamond & Martin 2021). Most studies  
68 in urban ecology and evolution to date have focused on urban effects on *mean* phenotypes,  
69 and no study has explicitly investigated how urbanisation affects phenotypic *variation*. The  
70 extent to which populations can adapt to urban environments could be partly associated with  
71 how urbanisation affects their phenotypic variation (Thompson *et al.* 2022). Phenotypic  
72 variation is tightly linked to eco-evolutionary processes (Fusco 2001; Pavlicev *et al.* 2011): it  
73 is an essential condition for current selection, it results from past selection pressures, and it  
74 depends on gene flow and phenotypic plasticity. As such, assessing how urbanisation affects  
75 phenotypic variation can help us understand the potential for future phenotypic changes in  
76 urban environments and the eco-evolutionary implications of such changes (Thompson *et al.*  
77 2022).

78

79 Recent single-species studies suggest that phenotypic variation could be affected by  
80 urbanisation (Caizergues *et al.* 2018; Gorton *et al.* 2018; Thompson *et al.* 2022). For example,  
81 in species with limited dispersal ability (i.e., whose dispersal occurs at a smaller scale than  
82 the scale at which the urban habitat varies), adaptation to local conditions could increase  
83 phenotypic variation within the urban matrix in heterogeneous urban environments. Findings

84 from urban and non-urban meta-populations of the common ragweed (*Ambrosia artemisiifolia*)  
85 are consistent with this prediction as inter-population variation in several fitness proxies was  
86 greater in urban compared to non-urban environments (Gorton *et al.* 2018). A meta-analysis  
87 of selection strength found weaker selection occurring in human-disturbed populations  
88 (Fugère & Hendry 2018; note that this analysis did not specifically test the effect of  
89 urbanisation on selection strength and only included one study directly associated with  
90 urbanisation), which if extrapolated to the urban context, could lead to higher phenotypic  
91 variation in urban populations compared to their non-urban counterparts. Overall, these  
92 studies converge with the notion that urban populations could display higher levels of  
93 phenotypic variation due to several eco-evolutionary processes. These findings also highlight  
94 that the extent to which urbanisation might impact phenotypic variation likely depends on the  
95 interplay between the temporal and spatial scale at which environmental conditions fluctuate  
96 in the urban habitat, as well as on the species' longevity and dispersal ability (Thompson *et*  
97 *al.* 2022).

98  
99 The temporal scale at which differences in phenotypic variation between urban and non-urban  
100 habitats manifest can help us evaluate their ecological causes, and is likely to determine the  
101 eco-evolutionary implications of increased phenotypic variation in urban habitats (Thompson  
102 *et al.* 2022). First, urban populations could display higher phenotypic variation than non-urban  
103 populations within a given breeding season (i.e., intra-annual variation; as a result, for  
104 example, of consistent differences in landscape heterogeneity between habitats; Pickett *et al.*  
105 2017). Second, urban populations could display higher phenotypic variation than non-urban  
106 populations due to larger yearly fluctuations in environmental conditions (i.e., inter-annual  
107 variation; if, for example, urban populations are more sensitive to changes in weather), with  
108 or without intra-annual differences in phenotypic variation between urban and non-urban  
109 populations. In the latter scenario, similar levels of phenotypic variation would be exposed to  
110 natural selection in short-lived species (e.g., annual species).

111

112 Urban environments have been referred to as spatially more heterogeneous than non-urban  
113 habitats of the same geographical area (Pickett *et al.* 2017). High urban habitat heterogeneity  
114 could increase phenotypic variation compared to adjacent non-urban habitats if, for example,  
115 urban organisms change their phenotype according to local environmental conditions (e.g.,  
116 through either developmental or later-life phenotypic plasticity). The empirical assessment of  
117 this idea, however, largely depends on the scale at which urban habitat heterogeneity is  
118 measured, the spatial scale at which the organism of interest operates and the heterogeneity  
119 of the non-urban habitat of reference (Pickett *et al.* 2017; Uchida *et al.* 2021). For example, a  
120 megacity could be spatially heterogeneous, containing a diverse array of habitats (e.g.,  
121 multiple urban parks with different ecological conditions, a varying level of impervious surface,  
122 etc.), and, thus, be overall vastly more heterogeneous than a neighboring non-urban habitat.  
123 However, species could reduce the range of environmental conditions that they experience  
124 through matching habitat choice (e.g., Muñoz *et al.* 2014), limiting the potential effect of urban  
125 habitat heterogeneity on phenotypic variation. Therefore, measuring habitat heterogeneity at  
126 different spatial scales will be paramount to understand the potential association between  
127 habitat heterogeneity and increased phenotypic variation in urban areas.

128

129 Here, we investigate how urbanisation impacts mean phenotypic values and phenotypic  
130 variation using a meta-analysis of 399 paired urban and non-urban comparisons of avian life-  
131 history traits (laying date, clutch size and number of fledglings) published between 1958 and  
132 2020 including 35 bird species (Figure 1). We use paired within species urban – non-urban  
133 comparisons to investigate the following questions: i) Is urbanisation associated with shifts in  
134 mean life-history traits? ii) Is urbanisation associated with changes in variation in life-history  
135 traits? iii) What is the temporal and spatial scale at which urbanisation correlates with changes  
136 in phenotypic variation? Based on previous research (Chamberlain *et al.* 2009; Sepp *et al.*  
137 2018), we predict that urban bird populations display on average earlier phenology, smaller  
138 clutch size and lower number of fledglings than non-urban populations. We also predict  
139 increased phenotypic variation in urban populations compared to non-urban populations for

140 all three traits examined (see above). We disentangle urban effects on phenotypic variation  
141 across different temporal and spatial scales, suggesting an ecological mechanism for the  
142 effects of urbanisation on avian phenotypic variation. This study provides, for the first time,  
143 meta-analytical evidence that urban conditions can magnify phenotypic variation in phenology  
144 and highlights the potential role of increased habitat heterogeneity in urban areas as an  
145 ecological mechanism underlying this effect.

146

## 147 **Material and methods**

### 148 **Literature review**

149 We began our literature search by inspecting two published reviews on the impact of  
150 urbanisation on avian biology (Chamberlain *et al.* 2009; Sepp *et al.* 2018). As we were  
151 interested in how phenology and reproduction were affected by urbanisation, we identified  
152 studies cited in Chamberlain *et al.* (2009) (n = 37) and Sepp *et al.* (2018) (n = 32) that could  
153 contain either raw data, or mean and variance estimates for first clutch laying initiation  
154 (hereafter laying date), clutch size and number of nestlings fledged per breeding attempt  
155 (hereafter number of fledglings), for paired urban and non-urban populations (see details  
156 below). Then, we performed four searches of the Web of Science Core Collection on the 27<sup>th</sup>  
157 of October 2020 (databases covered: SCI-EXPANDED – 1900-present, SSCI – 1956-present,  
158 A&HCI – 1975-present, BKCI-S – 2005-present, BKCI-SSH – 2005-present and ESCI – 2015-  
159 present) to recover studies published since 1900 and including all languages and all document  
160 types. We performed the following four searches on the Web of Science Core Collection: **(1)**  
161 TS=("urban\*" AND ("bird\*" OR "aves" OR "avian" OR "ornithol\*" OR "passerine\*" OR  
162 "passeriform\*" OR "songbird\*" OR *list of bird genera*) AND ("laying date" OR "lay date" OR  
163 "first egg" OR "clutch size" OR "eggs laid" OR "number of eggs" OR "fledgling\*" OR "fledging"  
164 OR "reproductive success" OR "fitness")); **(2)** TS=("urban\*" AND "bird" AND "laying date"); **(3)**  
165 TS=("urban\*" AND "bird" AND "clutch size"); **(4)** TS=("urban\*" AND "bird" AND "fledglings").  
166 The *list of avian genera* in the first search string consisted of a list of all avian genera and can

167 be found in Supplementary text D (see also acknowledgements). We complemented the  
168 search on the Web of Science Core Collection by searching Scopus using search string '(1)  
169 above (Scopus field 'TITLE-ABS-KEY'). Both literature searches, on the Web of Science Core  
170 Collection and Scopus, included studies published before the 27<sup>th</sup> of October 2020. We used  
171 the literature search results in these two major search engines to assess the  
172 comprehensiveness of our search (see Supplementary Text A for details). These searches  
173 found 892, 71, 198, 167 (on the Web of Science Core Collection) and 735 (on Scopus) studies,  
174 respectively, which we combined with the studies identified from Chamberlain *et al.* (2009)  
175 and Sepp *et al.* (2018) to create a list of 2,132 (non-unique) studies (Figure S1). We then de-  
176 duplicated this list using the R package 'revtools' (using exact matching of study titles in  
177 function 'find\_duplicates', v0.4.1; Westgate 2019) and by manually inspecting all titles and  
178 author lists. Our final list contained 1,166 unique studies (Figure S1), which we screened by  
179 reading their title and abstract (this first screening step was made by PC-L, CJB and DMD). If  
180 the title and/or abstract indicated that the paper could fit our requirements for data collection  
181 (see below), we read the study fully, aiming to extract mean, standard deviation (SD) and  
182 sample size (n) of our life-history traits of interest for urban and non-urban bird populations. If  
183 SD was not available but authors provided SE, the former was calculated as:  $SD = SE \times \sqrt{n}$ .  
184 Mean and SD were extracted from data quartiles and medians in four effect sizes from two  
185 studies following (Luo *et al.* 2016; Shi *et al.* 2020). When available, we extracted estimates  
186 per breeding season (i.e., papers sometimes reported mean, SD and n for urban and non-  
187 urban populations in multiple breeding seasons). If a study reported incomplete information  
188 for inclusion in our meta-analysis (e.g., mean was provided but not SD or SE), we contacted  
189 the authors to ask for this missing information (a complete list of authors that provided  
190 estimates can be found in the acknowledgements).

191

## 192 **Criteria for inclusion**

193 We were interested in investigating the effects of urbanisation on life-history traits, with an  
194 interest in testing the association between urbanisation and, mean and variation in trait values.



195 Paired urban – non-urban designs, where an urban population is compared to an adjacent  
196 non-urban population, are a powerful approach to identify the effects of urban living while  
197 controlling for temporal and geographical variation, and large-scale genetic structure among  
198 populations (Caizergues *et al.* 2021; Salmón *et al.* 2021). Therefore, we included studies if  
199 they compared geographically close (i.e., paired) urban and non-urban populations and  
200 reported laying date of the first clutches of the season, clutch size or number of fledglings for  
201 the same breeding season across both habitats. When multiple populations were compared  
202 along a gradient of urbanisation, we extracted estimates for the two populations at the  
203 extremes of the gradient (i.e., most and least urbanised populations). When studies combined  
204 estimates across several breeding seasons, we included them in our meta-analysis if urban  
205 and non-urban populations had been sampled in the same breeding seasons. All effect sizes  
206 were extracted by one author (PC-L). To validate data extraction, another author (MJT)  
207 checked 15% of the studies included in the meta-analysis, comprising 55 effect sizes (17.80%  
208 of the final data set; Supplementary Text B).

209

210 Initially, our dataset contained 443 paired urban – non-urban estimates from 40 bird species  
211 and 74 studies. Of these, three observations were removed due to missing sample sizes, 26  
212 observations were removed due to missing SD and 11 observations were removed because  
213 their sample size was one (which precludes the calculation of mean and SD). Four  
214 observations were removed because they reported a SD of zero (these indeed had very low  
215 sample sizes: 3, 2, 7, 2 observations). Our final dataset included 399 comparisons between  
216 paired urban – non-urban populations from 35 bird species and 68 studies (Figure 1; refs.:  
217 Middleton 1979; Schmidt & Steinbach 1983; Dhondt *et al.* 1984; Eden 1985; Stout *et al.* 1998;  
218 Boal & Mannan 1999; MCGowan 2001; Schoech & Bowman 2001; Solonen 2001, 2014;  
219 Antonov & Atanasova 2003; Rollinson & Jones 2003; Liven-Schulman *et al.* 2004; Millsap *et*  
220 *al.* 2004; Sharma *et al.* 2004; Beck & Heinsohn 2006; Conway *et al.* 2006; Mennechez &  
221 Clergeau 2006; Charter *et al.* 2007; Isaksson & Andersson 2007; Kelleher & O'Halloran 2007;  
222 Schoech *et al.* 2007; Hinsley *et al.* 2008; Isaksson *et al.* 2008; Newhouse *et al.* 2008; Solonen

223 & Ursin 2008; Berardelli *et al.* 2010; Ibáñez-Álamo & Soler 2010; Shustack & Rodewald 2011;  
224 Seress *et al.* 2012, 2018, 2020; Stracey & Robinson 2012; Brahmia *et al.* 2013; Cardilini *et al.*  
225 2013; Morrissey *et al.* 2014; Sumasgutner *et al.* 2014; Gahbauer *et al.* 2015; Gładalski *et al.*  
226 2015, 2016b, a, 2017, 2018; Lin *et al.* 2015; Wawyrzyniak *et al.* 2015; Bailly *et al.* 2016; Minias  
227 2016; Perlut *et al.* 2016; Biard *et al.* 2017; Capilla-Lasheras *et al.* 2017; Kopij 2017; Lee *et al.*  
228 2017; Pollock *et al.* 2017; Preiszner *et al.* 2017; Thornton *et al.* 2017; Bobek *et al.* 2018;  
229 Caizergues *et al.* 2018; Gryz & Krauze-Gryz 2018; de Satgé *et al.* 2019; Hajdasz *et al.* 2019;  
230 Kettel *et al.* 2019; Rosenfield *et al.* 2019; Welch-Acosta *et al.* 2019; Baldan & Ouyang 2020;  
231 Evans & Gawlik 2020; Jarrett *et al.* 2020; Luna *et al.* 2020; Partecke *et al.* 2020). Of these 399  
232 comparisons, 151 corresponded to comparisons of laying date (n = 32 studies), 119 were  
233 comparisons of clutch size (n = 42 studies) and 129 were comparisons of number of fledglings  
234 (n = 48 studies) (Figure S2). Last, there were 363 comparisons for single years (n = 47 studies)  
235 and an additional 36 comparisons included estimates across multiple years (n = 21 studies).

236

### 237 **Meta-analytic effect sizes**

238 We standardised laying date across studies by coding it as the number of days after the 1<sup>st</sup> of  
239 January (January 1<sup>st</sup> = 1). Mean laying date estimates across habitats always fell within the  
240 same calendar year. For each of the three life-history traits, we computed the log response  
241 ratio (lnRR) and the log coefficient of variation ratio (lnCVR) to investigate differences in mean  
242 values and variability between urban and non-urban populations (Hedges *et al.* 1999;  
243 Nakagawa *et al.* 2015; Senior *et al.* 2020). We calculated lnRR and lnCVR along with their  
244 associated sampling variances (Nakagawa *et al.* 2015) using the R function 'escalc' in the  
245 'metafor' R package (v3.4.0; Viechtbauer 2010). Both lnRR and lnCVR were calculated so that  
246 positive values meant higher estimates in urban populations compared to their non-urban  
247 counterparts. Often mean and variance values are positively associated (e.g., Taylor's Law;  
248 (Nakagawa & Schielzeth 2013; Cohen & Xu 2015). Therefore, we chose lnCVR over lnVR  
249 (i.e., log total variation ratio; Nakagawa *et al.* 2015) as the former accounts for the mean–  
250 variance relationship (Nakagawa *et al.* 2015; Senior *et al.* 2020). However, we carried out

251 sensitivity analysis using, among others, the log total variation ratio (section ‘Sensitivity  
252 analyses’).

253

### 254 **Quantifying habitat heterogeneity and urban index**

255 We calculated habitat heterogeneity from the 3CS LC (Copernicus Climate Change Service  
256 Land Cover) and the ESA-CCI LC (European Space Agency-Climate Change Initiative Land  
257 Cover) land cover products (ESA. Land Cover CCI Product User Guide 2017; ESA. 3CS Land  
258 Cover Product User Guide 2020). These datasets provide methodologically consistent land  
259 cover per year and gridded maps from 1992 to 2019, with a global coverage and a spatial  
260 resolution of circa 300 m per pixel (0.002778° or 10 arcseconds). Each pixel in the products  
261 is classified as one of the 22 land cover categories defined by the UN-FAO-LCCS (United  
262 Nations Food and Agriculture Organization Land Cover Classification System). From a subset  
263 of studies included in our main meta-analysis, we could extract the coordinates of their urban  
264 and non-urban populations (26 studies out of 68 provided accurate coordinates of their urban  
265 and non-urban populations). Then, we sampled the landscape of every study by extracting the  
266 number of pixels belonging to each land cover category around each urban and non-urban  
267 location (i.e., within a circular buffer around each location). The extraction was performed for  
268 several buffer radii from 250 m to 5000 m in intervals of 250 m. Landscape heterogeneity was  
269 calculated as the effective number of land covers present in each buffer and computed as the  
270 exponential of the Shannon-Wiener diversity index (i.e., Hill’s numbers for  $q = 1$ ) (Hill 1973;  
271 Chao *et al.* 2014), resulting into a measure that not only accounts for the absolute richness of  
272 land cover categories but also weights in the relative abundance of each category. An urban  
273 index was calculated as the proportion of each buffer area categorized as an ‘urban’ land  
274 cover type. Land cover data were processed and analysed using R (v.4.2.0; R Core Team  
275 2022). Geospatial vectorial operations were conducted utilising the ‘sf’ R package (v.1.0-7;  
276 Pebesma 2018) while raster extractions were performed with the ‘raster’ R package (v.3.5-15;  
277 Hijmans 2020). All geospatial analyses were performed in the WSG 1984 projected  
278 Coordinate Reference Systems, EPSG: 6326. Additionally, we calculated the distance

279 between each urban and non-urban pair of populations using the function '*pointDistance*' in  
280 the R package 'raster'. We could retrieve location information for 232 urban *versus* non-urban  
281 comparisons for laying date, clutch size and number of fledglings, from 11 species and 26  
282 studies between 1992 and 2017 (land cover data were not available before 1992; see above).

283

## 284 **Meta-analyses**

285 We handled the datasets, ran all analyses and produced visualisations using R (v.4.2.0; R  
286 Core Team 2022). To evaluate the effect of urbanisation on bird life-history traits, we fitted  
287 phylogenetic multilevel (intercept-only) meta-analyses for each response term (i.e., lnRR  
288 [Model 1] and lnCVR [Model 3]; Table 1) combining the three life-history traits (i.e., laying date,  
289 clutch size and number of fledglings; we also fitted models that separated variation between  
290 these traits; see below; Table 1). Both meta-analytic models estimated four random intercept  
291 effects, publication identity (i.e., among-study variation), population identity (i.e., in several  
292 cases, we found multiple studies from the same urban - non-urban populations pairs),  
293 phylogeny (more details below), species identity (i.e., among-species variation not explained  
294 by phylogeny), and an observation ID term. For the intercept-only models, we estimated total  
295 heterogeneity ( $I^2$ ) following Nakagawa & Santos (2012) and Senior et al. (2016b) as  
296 implemented in the R function '*i2\_ml*' ('orchaRd' R package v.0.0.0.9000; Nakagawa et al.  
297 2021).

298

## 299 **Phylogenies**

300 Phylogenetic trees were extracted from the Open Tree of Life (Hinchliff *et al.* 2015; Rees &  
301 Cranston 2017), using the interface provided by the R package 'rotl' (v3.0.12; Michonneau *et*  
302 *al.* 2016; OpenTreeOfLife *et al.* 2019). We calculated tree branch length (Grafen 1989) and  
303 generated a phylogenetic correlation matrix to include in all our phylogenetic multilevel meta-  
304 analytic models (Figure 1). We assessed the phylogenetic signal in our meta-analysis based  
305 on the proportion of variation explained by the phylogeny ( $I^2_{\text{phylogeny}}$ ; Cinar et al. 2022).

306

## 307 **Modelling heterogeneous variances and correlations among traits**

308 Laying date, clutch size and number of fledglings are often correlated in bird species (Rowe  
 309 *et al.* 1994; Dunn & Møller 2014). To assess whether urbanisation is associated with correlated  
 310 responses across life-history traits and to test the robustness of our results to the existence of  
 311 these correlations, we built trivariate meta-analytic models of lnRR and lnCVR that allowed us  
 312 to simultaneously estimate trait-specific means (i.e., one intercept for each trait – Equation 1),  
 313 trait-specific observation ID variances (i.e., one observation ID variance for each trait –  
 314 Equation 1 & Equation 2) and trait-specific among-study variances and correlation among  
 315 traits (Equation 1 & Equation 3). Including the random-effects detailed above, our model with  
 316 heterogeneous variances and among-study correlations among traits can be written as: (we  
 317 have omitted the term associated with sampling variance for simplicity – see Nakagawa *et al.*  
 318 (2015) for more details)

$$319 \quad y_i = \begin{bmatrix} \mu_{LD} \\ \mu_{CS} \\ \mu_{NF} \end{bmatrix} + \begin{bmatrix} \varepsilon_{i-LD} \\ \varepsilon_{i-CS} \\ \varepsilon_{i-NF} \end{bmatrix} + \begin{bmatrix} \tau_{t-LD} \\ \tau_{t-CS} \\ \tau_{t-NF} \end{bmatrix} + v_y + a_l + h_w \text{ (Equation 1)}$$

320

$$321 \quad \begin{matrix} \varepsilon_{i-LD} \\ \varepsilon_{i-CS} \\ \varepsilon_{i-NF} \end{matrix} \sim N\left( \begin{bmatrix} 0 \\ 0 \\ 0 \end{bmatrix}, \begin{bmatrix} \sigma_{\varepsilon-LD}^2 \\ \sigma_{\varepsilon-CS}^2 \\ \sigma_{\varepsilon-NF}^2 \end{bmatrix} \right) \text{ (Equation 2)}$$

322

$$323 \quad \begin{matrix} \tau_{t-LD} \\ \tau_{t-CS} \\ \tau_{t-NF} \end{matrix} \sim N\left( \begin{bmatrix} 0 \\ 0 \\ 0 \end{bmatrix}, \begin{bmatrix} \sigma_{t-LD}^2 & \rho_{LD-CS} \sigma_{t-LD} \sigma_{t-CS} & \rho_{LD-NF} \sigma_{t-LD} \sigma_{t-NF} \\ & \sigma_{t-CS}^2 & \rho_{CS-NF} \sigma_{t-CS} \sigma_{t-NF} \\ & & \sigma_{t-NF}^2 \end{bmatrix} \right) \text{ (Equation 3)}$$

324

$$325 \quad v_y \sim N(0, \sigma_v^2) \text{ (Equation 4)}$$

326

$$327 \quad a_l \sim N(0, A\sigma_a^2) \text{ (Equation 5)}$$

328

$$329 \quad h_w \sim N(0, \sigma_h^2) \text{ (Equation 6)}$$

330

331 Where  $y_i$  is the statistic of interest (lnRR or lnCVR) for the  $i$ th effect size ( $i = 1, 2, 3, \dots, k$ ; where  
332  $k$  is the number of the effect sizes included in the analysis - i.e., number of urban – non-urban  
333 paired comparisons). ‘LD’, ‘CS’, ‘NF’ refer to overall means ( $\mu$ ), variances ( $\sigma^2$ ) and correlations  
334 ( $\rho$ ) involving effect sizes for laying date (‘LD’), clutch size (‘CS’) and number of fledglings  
335 (‘NF’).  $\varepsilon_i$  is the observation ID deviation for the  $i$ th observation, which is assumed to follow a  
336 normal distribution with mean zero and variance  $\sigma_{\varepsilon-LD}^2$ ,  $\sigma_{\varepsilon-CS}^2$ ,  $\sigma_{\varepsilon-NF}^2$  for laying date, clutch size  
337 and number of fledglings, respectively.  $\tau_{t-LD}$ ,  $\tau_{t-CS}$ , and  $\tau_{t-NF}$  are the deviations from the  
338 mean associated with the  $t$ th study and trait (‘LD’, ‘CS’, or ‘NF’), each following a multivariate  
339 normal distribution with mean of zero and variance-covariance structure detailed in Equation  
340 5 ( $p$  provides the correlations between  $\tau_{t-LD}$ ,  $\tau_{t-CS}$ , and  $\tau_{t-NF}$ ).  $v_y$  provides the deviation from  
341 the overall mean associated with the  $y$ th population (Equation 4).  $a_l$  is the phylogenetic effect  
342 for the  $l$ th species, which follows a normal distribution with mean equal to zero and variance-  
343 covariance structure given by  $\sigma_a^2$ , the variance of the phylogenetic effect, and  $A$ , a  $l$  by  $l$  matrix  
344 of distances between species calculated from a phylogenetic tree (Equation 5; details above).  
345  $h_w$  captures among species variation not explained by the phylogenetic effect and follows a  
346 normal distribution around zero and variance  $\sigma_h^2$  (Equation 6).

347

348 We compared models with different constraints in the parameters of the variance-covariance  
349 structure in Equation 3 to assess the strength of evidence for heterogeneous variances and  
350 correlations among traits (see results in Tables S2 and S4). We fitted these trivariate meta-  
351 analytic models in the ‘metafor’ R package (‘*rma.mv*’ function; v3.4.0; Viechtbauer 2010) using  
352 maximum likelihood and compared models using AIC (Akaike Information Criterion; Burnham  
353 et al. 2011). We then calculated a  $\Delta$ AIC value for each model (i.e., the difference in AIC  
354 between a given model and the model with the lowest AIC) and used this value to assess the  
355 strength of evidence for a given variance-covariance structure. We fitted models with the  
356 following constraints in the variance-covariance structure:

357 (i) Single variance across traits and zero covariances:

358  $\sigma_{t-LD}^2 = \sigma_{t-CS}^2 = \sigma_{t-NF}^2$ ; and all  $p = 0$

359 (ii) Compound symmetric variance-covariance matrix:

360  $\sigma_{t-LD}^2 = \sigma_{t-CS}^2 = \sigma_{t-NF}^2$ ; and  $p_{LD-CS} = p_{LD-NF} = p_{CS-NF}$

361 (iii) Heteroscedastic compound symmetric variance-covariance matrix:

362  $\sigma_{t-LD}^2, \sigma_{t-CS}^2$  and  $\sigma_{t-NF}^2$  can vary freely but  $p_{LD-CS} = p_{LD-NF} = p_{CS-NF}$

363 (iv) Diagonal variance-covariance matrix:

364  $\sigma_{t-LD}^2, \sigma_{t-CS}^2$  and  $\sigma_{t-NF}^2$  can vary freely but all  $p = 0$

365 (v) Unstructured variance-covariance matrix

366  $\sigma_{t-LD}^2, \sigma_{t-CS}^2, \sigma_{t-NF}^2, p_{LD-CS}, p_{LD-NF}$  and  $p_{CS-NF}$  can vary freely

367

### 368 **Within- and between-breeding season differences in phenology and life-history traits**

369 Urban and non-urban populations may differ in both within- and between-breeding season  
370 variation in life-history traits. However, differences in variation for these two temporal scales  
371 are likely generated by contrasting ecological and evolutionary processes. To disentangle  
372 processes operating at these two temporal scales, we performed additional meta-analyses  
373 including i) urban – non-urban comparisons within breeding seasons ( $k = 363$  comparisons  
374 from 47 studies in the original dataset with effect sizes per year; Model 5) and ii) urban – non-  
375 urban comparisons between breeding seasons (i.e., combining all within-breeding season  
376 estimates from a study;  $k = 36$  comparisons present in the original data set, plus 67 additional  
377 comparison calculated from within-breeding season estimates; see below). When a given  
378 study reported estimates across multiple breeding seasons, we calculated between-breeding  
379 season mean and variance as:

380

381  $\bar{x}_{among-season} = \sum_{i=1}^g \bar{x}_i \frac{n_i}{N}$ ; where,  $N = \sum_{i=1}^g n_i$  (Equation 7)

382

383  $S_{among-season}^2 = \sum_{i=1}^g \frac{n_i}{N} S_i^2 + \sum_{i=1}^g \frac{n_i}{N} (\bar{x}_i - \bar{x}_{among-season})^2$  (Equation 8)

384



385 Where,  $\bar{x}_{among-season}$  and  $S^2_{among-season}$  are mean and variance across multiple breeding  
386 seasons.  $g$  is the total number of breeding seasons reported by a given study;  $\bar{x}_i$ ,  $s_i^2$ ,  $n_i$ , are  
387 mean, variance and sample size for each breeding season  $i$ .  $\bar{x}_{among-season}$  for a given study  
388 is, therefore, the weighted average across breeding seasons (Equation 7); whereas  
389  $S^2_{among-season}$  for a given study is the weighted sum of within-season variances (first term in  
390 Equation 8) and between-season mean variances (second term in Equation 8).

391

### 392 **Assessing the effect of urbanisation and habitat heterogeneity on differences in** 393 **phenotypic variation between habitats**

394 We investigated the spatial drivers of differences in phenotypic variation between urban and  
395 non-urban populations using the subset of studies which allowed the quantification of an urban  
396 index in urban and non-urban populations (see above). We first verified that the urban index  
397 was indeed higher for urban than for non-urban populations. We compared the urban index in  
398 urban and non-urban populations at different spatial scales via linear models, with the  
399 difference in urban index between population as the response variable and an intercept term.  
400 Then, to assess whether the increase in phenotypic variation in urban habitats was predicted  
401 by habitat heterogeneity and/or urban index, we ran an additional meta-regression to explain  
402 differences in phenotypic variation between urban and non-urban populations (i.e., lnCVR),  
403 where the difference in habitat heterogeneity and urban index between urban and non-urban  
404 populations were included as continuous moderators. This meta-regression included 232  
405 urban – non-urban comparisons from 11 species and 26 studies (i.e., the subset of  
406 observations after 1992 for which geolocations were available).

407

### 408 **Sensitivity analyses**

409 We assessed the robustness of our results with several complementary analyses. First, we  
410 re-ran the trivariate lnRR model (Model 2; Table 1) using Hedges'  $g$  (Hedges 1981) with  
411 heteroscedastic population variances as the response variable (Table 1; Model 8; i.e., 'SMDH',



412 calculated using the R function 'escalc' in the 'metafor' R package (v3.4.0; Viechtbauer 2010)).  
413 In addition, we assessed the robustness of the lnCVR results by re-running the trivariate  
414 lnCVR model (Model 4; Table 1) using lnVR as the response variable (i.e., the logarithm of  
415 the total variation ratio; Nakagawa et al. 2015; Model 9; Table 1). Last, we used an alternative  
416 approach that directly models the log of the phenotypic standard deviation (lnSD) to assess  
417 differences in phenotypic variation between urban and non-urban populations (Eq. 18 in  
418 Nakagawa et al. (2015); Model 10; Table 1). We followed the model specification shown in  
419 Senior et al. (2016a), in short:

420

$$421 \quad \ln SD_j = \beta_0 + \beta_1 \text{Habitat}_j + \beta_2 \ln \overline{\text{Mean}}_j + \tau_{i[j]} + v_y + a_l + h_w \text{ (Equation 9)}$$

422

423 Where  $\beta_0$  is the overall intercept,  $\beta_1$  is the habitat effect on lnSD (i.e., a  $\beta_1$  statistically different  
424 from zero would indicate that urban and non-urban populations differ in their phenotypic  
425 variation) and  $\beta_2$  is the slope of the regression of (log) mean values against (log) standard  
426 deviations, which is explicitly modelled.  $v_y$ ,  $a_l$  and  $h_w$  are as per Equation 1.  $\tau_{i[j]}$  is the random  
427 effect for the  $j$ th effect size in the  $i$ th study. Within each study effect sizes across habitats are  
428 assumed to be correlated; this correlation is calculated by the model (Senior *et al.* 2016a). We  
429 applied the model in Equation 9 for each trait independently (i.e., three univariate models, one  
430 per trait).

431

### 432 **Publication bias**

433 We assessed the evidence for the existence of two types of publication biases, small-study  
434 and decline effects (time-lag effects), following Nakagawa et al. (2022). For that, we ran four  
435 additional uni-moderator multilevel meta-analytic models, two for lnRR and two lnCVR. Each  
436 of these models included as a single moderator either the square-root of the inverse of the  
437 effective sample size or the mean-centered year of study publication (Trikalinos & Ioannidis  
438 2005; Nakagawa *et al.* 2022). The variation explained by these moderators (i.e.,  $R^2_{\text{marginal}}$ ) was

439 calculated using the R function 'r2\_ml' ('orchaRd' R package v.0.0.0.9000; Nakagawa et al.  
440 2021).

441

## 442 **Results**

443 After systematically inspecting 1,166 studies published between 1958 and 2020 (Figure S1),  
444 our meta-analysis included 399 urban – non-urban comparisons for three bird life-history traits:  
445 laying date (k = 151 effect sizes, n = 32 studies), clutch size (k = 119 effect sizes, n = 42  
446 studies) and number of fledglings (k = 129 effect sizes, n = 48 studies) (Figure 1). This dataset  
447 included 35 bird species, with most studies located in the northern hemisphere (Figure 1c).

448

### 449 **i) Is urbanisation associated with shifts in mean life-history traits?**

450 We found that urban populations tended to have, on average, 3.6% lower mean values than  
451 their non-urban counterparts, but note that the 95% confidence interval (hereafter 'CI') for this  
452 estimate overlapped zero (Model 1: lnRR mean estimate [95% CI] = -0.035 [-0.076,0.005];  
453 Figure S3; Table S1). Total heterogeneity was high ( $I^2_{\text{total}} = 97.8\%$ ), with 17.2% of it explained  
454 by phylogenetic and species-specific effects combined ( $I^2_{\text{phylogeny}} = 1.7\%$ ;  $I^2_{\text{species ID}} = 15.5\%$ ),  
455 while 8.4% was explained by differences among studies (Table S1). Further analyses  
456 calculating urban effects per trait and accounting for potential covariation in the response to  
457 urbanisation across the three focal traits (i.e., using a model with an unstructured variance-  
458 covariance matrix; see Methods and Table S2) confirmed that urban populations had indeed  
459 lower mean values in every life-history trait: urban populations laid their eggs earlier (Model 2:  
460 lnRR [95% CI] = -0.048 [-0.084, -0.012]; Figure 2a), laid smaller clutches (Model 2: lnRR [95%  
461 CI] = -0.066 [-0.107, -0.025]; Figure 2a), and tended to produce fewer fledglings per clutch  
462 than non-urban populations (Model 2: lnRR [95% CI] = -0.070 [-0.171, 0.032]; Figure 2a). This  
463 meta-analytic model estimated different random effect intercepts per trait and allowed for  
464 correlations across traits (Model 2; see Methods for details). This model revealed correlations  
465 in the response to urbanisation across traits: studies reporting earlier laying date in urban

466 populations also reported more similar clutch size and number of fledglings between  
467 populations (i.e., negative correlations between lnRR for laying dates and clutch size; Figure  
468 3a & 3b). Likewise, studies reporting large differences in clutch size between urban and non-  
469 urban populations also reported large differences between both habitats in number of  
470 fledglings (Figure 3c; see 'Study ID (correlations)' in Table S3; i.e., correlations among studies  
471 in the values of lnRR for each trait).

472

### 473 **ii) Is urbanisation associated with changes in variation in life-history traits?**

474 The coefficient of phenotypic variation in urban populations was, on average, 4.4% higher than  
475 in non-urban populations, but note that the 95%CI for this estimate overlapped zero (Model 3:  
476 lnCVR mean estimate [95% CI] = 0.043 [-0.092, 0.178];  $R^2_{\text{total}} = 74.3\%$ ; Figure S5 and Table  
477 S1). 9.1% of the heterogeneity in lnCVR was explained by phylogenetic and species-specific  
478 effects combined ( $R^2_{\text{phylogeny}} = 5.8\%$ ;  $R^2_{\text{species ID}} = 3.3\%$ ), while differences between studies  
479 explained no heterogeneity in lnCVR ( $R^2_{\text{study ID}} = 0.0\%$ ; Table S1). A subsequent model of  
480 lnCVR separating urban effects on phenotypic variation per trait and accounting for potential  
481 covariation across the three investigated traits in the response to urbanisation (see Methods  
482 and Table S4) revealed that the overall effect of urbanisation on life-history trait variation was  
483 driven by urban populations having a more variable phenology than their non-urban  
484 counterparts (Model 4: lnCVR mean for laying date [95% CI] = 0.176 [0.084, 0.268], i.e., 19.2%  
485 more variation, on average, in laying date in urban than non-urban populations). Although the  
486 95%CIs overlapped zero, the direction of the average effects for clutch size and number of  
487 fledglings also reflected higher phenotypic variation in urban compared to non-urban  
488 populations (Model 4: lnCVR mean estimates [95% CI]: clutch size = 0.055 [-0.051, 0.160],  
489 number of fledglings = 0.037 [-0.096, 0.171]; Figure 2b). We did not find evidence for  
490 correlations in lnCVR between the three life-history traits (Figure 3; the model including  
491 correlations among traits scored more than 1.08 AIC points below the top model, which only  
492 included independent Study ID random intercepts per trait [Model 4]; Table S4; Table S5).

493

494 **iii) What is the temporal and spatial scale at which urbanisation affects phenotypic**  
495 **variation?**

496 Differences in phenotypic variation in laying date between the urban and non-urban  
497 populations arose from differences in variation within breeding seasons (i.e., intra-annual)  
498 rather than between breeding seasons (i.e., inter-annual; Table 2). While laying dates in urban  
499 populations were more variable than in non-urban populations within breeding seasons (Model  
500 5: InCVR mean estimate [95% CI] = 0.177 [0.078, 0.281]; Table 2), a subsequent meta-analytic  
501 model isolating effects on phenotypic variation arising from between breeding season  
502 fluctuations revealed no difference between urban and non-urban populations (Model 6:  
503 InCVR intercept mean [95% CI] = 0.074 [-0.014, 0.161]; Table 2). The sample size for this  
504 latter meta-analysis was almost four times smaller than for the meta-analysis of within  
505 breeding season differences in variation; however, the InCVR estimates were very different  
506 between these models: the mean InCVR within breeding seasons was more than 2.4 times  
507 larger than the mean InCVR among breeding seasons (Table 2).

508  
509 Furthermore, to assess whether urbanisation and/or habitat heterogeneity could explain  
510 increased phenotypic variation in urban bird populations, we investigated the extent to which  
511 our quantification of urban index and habitat heterogeneity predicted differences in phenotypic  
512 variation across populations. First, we confirmed that the urban populations included in our  
513 meta-analysis showed higher levels of urbanisation than paired non-urban populations  
514 regardless of the spatial scale used (urban index in urban population  $\pm$  SE =  $0.669 \pm 0.047$ ;  
515 urban index in non-urban population  $\pm$  SE =  $0.021 \pm 0.007$ ; at a spatial scale of 2000 m in both  
516 cases for reference; Figure 4a). Including the difference in urban index and habitat  
517 heterogeneity between paired urban and non-urban populations as a moderator in a meta-  
518 regression revealed that the more heterogeneous the urban habitat was, the larger the  
519 phenotypic variation in this habitat compared to the non-urban habitat; this effect was  
520 particularly strong at medium-large spatial scales (Figure 4c). Differences in urban index  
521 between populations did not strongly explain variation in InCVR (Figure 4b). Urban and non-

522 urban populations in each studied pair were located at a mean distance of 65.4 km (median =  
523 33.1 km; range = [2.4 km, 625.1 km]; n = 26 geo-referenced studies).

524

#### 525 **iv) Sensitivity analyses and assessment of publication bias**

526 In line with our main analysis of  $\ln RR$  (Table S3), using SMDH as the effect size provided  
527 negative estimates (i.e., lower phenotypic means in urban populations) for laying dates (SMDH  
528 mean estimate [95% CI] = -0.298 [-0.634, 0.039]), clutch size (SMDH mean estimate [95% CI]  
529 = -0.145 [-0.420, 0.130]) and number of fledglings (SMDH mean estimate [95% CI] = -0.022  
530 [-0.298, 0.254]) (Model 8 in Table 1). Uncertainty around mean SMDH estimates was high and  
531 the 95% CIs overlapped zero. Analysing  $\ln VR$  instead of  $\ln CVR$  provided further evidence for  
532 increased phenotypic variation in urban populations, particularly for phenology (Model 9 in  
533 Table 1): the mean  $\ln VR$  estimate for laying date was positive and statistically different from  
534 zero ( $\ln VR$  mean estimate for laying date [95% CI] = 0.158 [0.069, 0.247]). As in our  $\ln CVR$ ,  
535  $\ln VR$  mean estimates for clutch size and number of fledglings were close to zero ( $\ln VR$  mean  
536 estimate for clutch size [95% CI] = -0.012 [-0.110, 0.056];  $\ln VR$  mean estimate for number of  
537 fledglings [95% CI] = -0.034 [-0.120, 0.052]). Additionally, the arm-based model of  $\ln SD$  for  
538 laying date (Model 10 in Table 1) revealed a positive 'urban' effect on  $\ln SD$ : urban populations  
539 had  $\ln SD$  values 0.197 higher than non-urban populations (i.e.,  $\beta_1$  in Equation 9; 95%CI =  
540 [0.122, 0.272]). Laying date (log) mean phenotypic values were positively correlated with  $\ln SD$   
541 (i.e.,  $\beta_2$  in Equation 9; estimate [95%CI] = 0.416 [0.068, 0.764]). The arm-based models of  
542 clutch size and number of fledglings confirmed correlations between  $\ln Mean$  and  $\ln SD$  ( $\beta_2$  in  
543 Equation 9 for clutch size, estimate [95%CI] = 0.326 [0.070, 0.582]; for number of fledglings,  
544 estimate [95%CI] = 0.231 [0.155, 0.307]), but did not provide evidence for urban effects on  
545 phenotypic variation in clutch size or number of fledglings ( $\beta_1$  in Equation 9 for clutch size,  
546 estimate [95%CI] = 0.020 [-0.079, 0.119]; for number of fledglings, estimate [95%CI] = -0.017  
547 [-0.099, 0.065]). We did not find evidence of publication bias in  $\ln RR$  or  $\ln CVR$  (Supplementary  
548 Text C).

## 549 Discussion

550 We compiled a global dataset of bird life-history traits for paired urban and non-urban  
551 populations of the same species to assess how urban living is related to changes in phenotypic  
552 means and variation for breeding phenology, reproductive effort, and reproductive success. A  
553 phylogenetically controlled multilevel meta-analysis of this dataset confirms a well-  
554 documented effect of urbanisation on mean phenotypes: urban bird populations lay earlier and  
555 smaller clutches than their non-urban counterparts. This model, however, also reveals  
556 correlated responses to urbanisation across life-history traits: e.g., the earlier the laying date  
557 in urban populations, the smaller the difference in clutch sizes between habitats. Our study  
558 goes a step further than previous meta-analyses in urban ecology by explicitly investigating  
559 how urbanisation could impact phenotypic variation. Our findings highlight that urbanisation is  
560 associated with both a decrease in mean phenotypes, and an increase phenotypic variation.  
561 Investigating the temporal and spatial scale at which urban phenotypic variation increases  
562 revealed hints at the ecological causes and evolutionary consequences.

563

564 Urbanisation has been associated with shifts in mean phenotypic values across a many  
565 organisms (Alberti *et al.* 2017; Merckx *et al.* 2018; Santangelo *et al.* 2022), including birds,  
566 which generally show smaller body sizes and lower life-history trait values in urban habitats  
567 (Chamberlain *et al.* 2009; Sepp *et al.* 2018; Thompson *et al.* 2022). Our analyses expand the  
568 spatial, temporal and phylogenetic coverage of previous meta-analyses of the avian literature  
569 (Chamberlain *et al.* 2009; Sepp *et al.* 2018), and agree on their findings. Our results indicate  
570 that urban bird populations lay their eggs earlier and produce smaller clutches, which results  
571 in a lower number of surviving nestlings, than their non-urban neighbouring populations. Note,  
572 that our analysis indicates a high total heterogeneity in InRR ( $I^2_{\text{total}} = 97.8\%$ ). This finding  
573 indicates large variation (e.g., among studies and species) in how urbanisation associates with  
574 changes in mean phenotypes and suggests that additional ecological traits (e.g., diet or  
575 migratory strategy) may also affect how populations respond to urbanisation. Our results also

576 indicate that the mean response to urbanisation is correlated among traits. Interestingly, we  
577 found that the earlier the laying dates were in urban *versus* non-urban populations, the smaller  
578 the difference in clutch size and in number of surviving nestlings between habitats. Many bird  
579 species show a negative phenotypic and genetic correlation between clutch size and lay date  
580 (Rowe *et al.* 1994; Sheldon *et al.* 2003; Dunn & Møller 2014), and these two traits are often  
581 hypothesized to co-evolve (Garant *et al.* 2008). All else being equal, urban conditions  
582 triggering an earlier onset of reproduction (because of e.g., light pollution (Dominoni *et al.*  
583 2013) or increased resource availability during winter (Schoech *et al.* 2004)) could indirectly  
584 increase clutch size and, therefore, reduce differences in reproductive output between urban  
585 and non-urban populations that arise via other mechanisms (e.g., resource limitation in spring;  
586 Seress *et al.* 2018, 2020). The extent to which mean phenotypic shifts represent adaptive  
587 responses to urbanisation in birds, either via genetic changes or plasticity, or are maladaptive,  
588 is mostly unknown (Lambert *et al.* 2020; Branston *et al.* 2021; Caizergues *et al.* 2022;  
589 Santangelo *et al.* 2022). Our results, however, highlight that phenotypic shifts in urban  
590 populations are widespread and that the response to urbanisation of associated life-history  
591 traits should be investigated together.

592

593 Urbanisation has been recently hypothesised to increase phenotypic variation and, indeed,  
594 higher variation in morphological traits of urban great tits (*Parus major*) and blue tits (*Cyanistes*  
595 *caeruleus*) has been recently reported (Thompson *et al.* 2022). Our findings greatly expand  
596 the evidence for this emerging hypothesis showing that urbanisation is overall associated with  
597 increases in variation in laying date across many bird species. Previous studies have  
598 suggested that city characteristics, such as warmer temperatures in early spring due to the  
599 urban heat island effect, could allow birds to lay more clutches per season (Yeh & Price 2004;  
600 Schoech *et al.* 2008), with thereby longer breeding seasons and hence higher phenotypic  
601 variation in urban laying dates (a similar result has also been reported in Lepidoptera; Merckx  
602 *et al.* 2021). This effect, however, does not necessarily explain our results as our meta-  
603 analysis only included first clutch laying dates per season. As such, our findings indicate that



604 urban bird populations display more variation in the *onset* of reproduction than their non-urban  
605 neighbours.

606

607 Higher phenotypic variation in urban than in non-urban populations within breeding seasons  
608 could be explained by at least two, non-exclusive, eco-evolutionary mechanisms: differences  
609 in the underlying additive genetic variance in laying date, whereby urban birds have a wider  
610 range of breeding values for laying date; and / or differences in habitat heterogeneity  
611 influencing plasticity in laying date, whereby urban areas have larger environmental variation  
612 than non-urban habitats (Shochat *et al.* 2006; Heisler & Brazel 2018; Strubbe *et al.* 2020;  
613 Thompson *et al.* 2022). No study to date has investigated whether urban birds show higher  
614 additive genetic variance than non-urban populations. However, genetic analyses of European  
615 great tits in urban and non-urban habitats generally suggest small differences in the magnitude  
616 of genetic variation between habitats (Björklund *et al.* 2010; Caizergues *et al.* 2021; Salmón  
617 *et al.* 2021). This is, perhaps, not surprising given the high mobility of birds and the fact that  
618 gene flow between urban and non-urban bird populations likely occurs at a large spatial scale  
619 (Salmón *et al.* 2021). Interestingly, some studies have reported weaker selection for laying  
620 date in urban areas than in non-urban habitats, suggesting relaxed selection on phenology in  
621 urban birds (Caizergues *et al.* 2018; Branston *et al.* 2021), which could increase genetic  
622 variation in phenology. Assessing differences in phenotypic variation between urban and non-  
623 urban populations of less mobile species will be important to evaluate how biological traits  
624 (e.g., dispersal ability) determine the evolutionary impact of urban ecological conditions. To  
625 this end, previous work in mammal and amphibian species that have a lower dispersal ability  
626 than birds suggests a similar level of (genetic) variation between urban and non-urban habitats  
627 (Fusco *et al.* 2021; Richardson *et al.* 2021).

628

629 Habitat complexity differs between urban and non-urban habitats (Arnfield 2003; Pickett *et al.*  
630 2017). Our analyses indicate that differences in urban *versus* non-urban habitat heterogeneity  
631 could indeed help to explain the observed pattern of increased phenotypic variation in urban



632 populations. Several ecological mechanisms could mediate this effect. Urban environments  
633 are characterised by an array of microhabitats with varying levels of human pressure, exotic  
634 plant species and resource availability. Thus, the intensity and timing of the environmental  
635 cues that birds use to time their reproduction could vary at a small local scale, increasing  
636 phenotypic variation in phenology in the presence of plasticity. The existence of plastic  
637 responses to urban habitat heterogeneity, which our results might indicate, do not preclude  
638 selection from acting on urban bird populations. First, plasticity is an important mechanism of  
639 adaptation, sometimes aligned in direction with adaptative genetic changes (De Lisle *et al.*  
640 2022), and indeed is often involved in adaptation to urban environments (Halfwerk *et al.* 2019;  
641 Campbell-Staton *et al.* 2021). Second, plastic responses can aid adaptation to urban  
642 conditions in the presence of genetic-by-environment interactions by increasing genetic  
643 variation available for natural selection (Via & Lande 1985). Addressing which evolutionary  
644 mechanisms cause the observed increase in phenotypic variation in urban bird populations is  
645 beyond the scope of this study and we acknowledge that these arguments are largely  
646 speculative at this point. However, our findings highlight that eco-evolutionary processes could  
647 largely differ between urban and non-urban bird populations and generate new avenues for  
648 future research in urban ecology and evolution.

649

650 In agreement with our initial predictions, habitat heterogeneity was associated with the  
651 magnitude of the difference in phenotypic variation between urban and non-urban bird  
652 populations. However, we acknowledge that this analysis has several limitations and that the  
653 results require cautious interpretation. First, only a subset of published studies provided  
654 coordinates for their urban and non-urban study populations (30 out of 65 published papers).  
655 When study site coordinates were provided, only one pair of coordinates per study location  
656 was provided, preventing an accurate assessment of the actual area over which a given  
657 breeding population was studied. Additionally, it is common in urban eco-evolutionary studies  
658 to monitor several populations within one single city. However, in most studies, spatial  
659 information was provided at the scale of the whole city (e.g., a single set of coordinates),

660 preventing the accurate quantification of habitat heterogeneity for every sub-population within  
661 a given urban habitat. These limitations highlight that the ability to perform global meta-  
662 analyses on the effects of urban habitat heterogeneity on phenotypic variation would be greatly  
663 improved if individual studies in urban ecology provided accurate coordinates of the location  
664 of their study populations. Reporting such information would allow future research synthesis  
665 to quantify phenotypic variation within urban populations (e.g., across different sub-  
666 populations in the same city) and between urban and non-urban populations.

667

668 Taken together, our results show that urbanisation is associated with both a decrease in mean  
669 phenotypic values and increasing phenotypic variation in bird populations. Our analyses also  
670 highlight a temporal and spatial mechanism that could generate such differences in phenotypic  
671 variation between urban and non-urban habitats. We show that urban bird populations have a  
672 more variable phenology than non-urban conspecifics within breeding seasons (i.e.,  
673 differences in phenology across habitats are seemingly not due to between-year fluctuations)  
674 suggesting that the ecological conditions that generate such differences are constant across  
675 multiple years. Our coupled spatial analysis indicates habitat heterogeneity and plastic  
676 responses as potential eco-evolutionary drivers generating these results. The eco-  
677 evolutionary implications of higher phenotypic variation in urban environments will likely vary  
678 among species (Thompson *et al.* 2022) and our findings highlight the need for detailed  
679 investigation of these consequences. To this end, long-term studies of individually marked  
680 organisms in replicated paired urban and non-urban environments could be particularly fruitful  
681 to unravel whether differences in phenotypic variation between urban and non-urban  
682 populations are caused by differences in underlying genetic variation and/or plastic responses  
683 to the urban environment.

684

## 685 **Acknowledgements**

686 We would like to thank Paul Bellamy, Clint Boal, Peter Ferns, Michał Gładalski, Shelley A.  
687 Hinsley, Piotr Minias, Christy Morrissey, Matthew Reudink, Staffan Roos, Renaud Scheifler,  
688 Christine Stracey, Daniel Shustack and Jarosław Wawrzyniak for kindly replying to our data  
689 queries. We are grateful to Antje Girndt for developing the list of avian genera included in our  
690 search string.

691

## 692 **Funding**

693 PC-L, CJB and DMD were funded by a Highlight Topics grant from the Natural Environment  
694 Research Council awarded to DMD (NE/S005773/1).

695

## 696 **Competing interests**

697 The authors declare no competing interests.

698

## 699 References

- 700 Alberti, M., Correa, C., Marzluff, J.M., Hendry, A.P., Palkovacs, E.P., Gotanda, K.M., *et al.*  
701 (2017). Global urban signatures of phenotypic change in animal and plant populations.  
702 *Proceedings of the National Academy of Science*, 114, 8951–8956.
- 703 Antonov, A. & Atanasova, D.Y. (2003). Small-scale differences in the breeding ecology of  
704 urban and rural Magpies *Pica pica*. *Ornis Fennica*, 80, 21–30.
- 705 Arnfield, A.J. (2003). Two decades of urban climate research: A review of turbulence,  
706 exchanges of energy and water, and the urban heat island. *International Journal of*  
707 *Climatology*, 23, 1–26.
- 708 Bailly, J., Scheifler, R., Berthe, S., Clément-Demange, V.A., Leblond, M., Pasteur, B., *et al.*  
709 (2016). From eggs to fledging: Negative impact of urban habitat on reproduction in two  
710 tit species. *Journal of Ornithology*, 157, 377–392.
- 711 Baldan, D. & Ouyang, J.Q. (2020). Urban resources limit pair coordination over offspring  
712 provisioning. *Scientific Reports*, 10, 15888.
- 713 Beck, N.R. & Heinsohn, R. (2006). Group composition and reproductive success of  
714 cooperatively breeding white-winged choughs (*Corcorax melanorhamphos*) in urban  
715 and non-urban habitat. *Austral Ecology*, 31, 588–596.
- 716 Berardelli, D., Desmond, M.J. & Murray, L. (2010). Reproductive success of burrowing owls  
717 in urban and grassland habitats in southern New Mexico. *Wilson Journal of Ornithology*,  
718 122, 51–59.
- 719 Biard, C., Brischoux, F., Meillère, A., Michaud, B., Nivière, M., Ruault, S., *et al.* (2017).  
720 Growing in cities: An urban penalty for wild birds? A study of phenotypic differences  
721 between urban and rural great tit chicks (*Parus major*). *Frontiers in Ecology and*  
722 *Evolution*, 5, 79.
- 723 Björklund, M., Ruiz, I. & Senar, J.C. (2010). Genetic differentiation in the urban habitat: the  
724 great tits (*Parus major*) of the parks of Barcelona city. *Biological Journal of the Linnean*  
725 *Society*, 99, 9–19.
- 726 Boal, C.W. & Mannan, R.. W. (1999). Comparative Breeding Ecology of Cooper's Hawks in  
727 Urban and Exurban Areas of Southeastern Arizona. *The Journal of Wildlife*  
728 *Management*, 63, 77–84.
- 729 Bobek, O., Gal, A., Saltz, D. & Motro, U. (2018). Effect of nest-site microclimatic conditions  
730 on nesting success in the Lesser Kestrel *Falco naumanni*. *Bird Study*, 65, 444–450.
- 731 Brahmia, Z., Scheifler, R., Crini, N., Maas, S., Giraudoux, P. & Benyacoub, S. (2013).  
732 Breeding performance of blue tits (*Cyanistes caeruleus ultramarinus*) in relation to lead  
733 pollution and nest failure rates in rural, intermediate, and urban sites in Algeria.  
734 *Environmental Pollution*, 174, 171–178.
- 735 Branston, C.J., Capilla, P., Christopher, L., Griffiths, K., White, S. & Dominoni, D.M. (2021).  
736 Urbanisation weakens selection on the timing of breeding and clutch size in blue tits but  
737 not in great tits. *Behavioral Ecology and Sociobiology*, 75, 155.
- 738 Burnham, K.P., Anderson, D.R. & Huyvaert, K.P. (2011). AIC model selection and  
739 multimodel inference in behavioral ecology: some background, observations, and  
740 comparisons. *Behavioral Ecology and Sociobiology*, 65, 23–35.

- 741 Caizergues, A.E., Charmantier, A. & Grégoire, A. (2018). Urban versus forest ecotypes are  
742 not explained by divergent reproductive selection. *Proceedings of the Royal Society B*,  
743 285, 20180261.
- 744 Caizergues, A.E., Grégoire, A., Choquet, R., Perret, S. & Charmantier, A. (2022). Are  
745 behaviour and stress-related phenotypes in urban birds adaptive? *Journal of Animal*  
746 *Ecology*, 00, 1–15.
- 747 Caizergues, A.E., le Luyer, J., Grégoire, A., Szulkin, M., Senar, J., Charmantier, A., *et al.*  
748 (2021). Epigenetics and the city: non-parallel DNA methylation modifications across  
749 pairs of urban-rural Great tit populations. *Evolutionary Applications*, 15, 149–165.
- 750 Campbell-Staton, S.C., Velotta, J.P. & Winchell, K.M. (2021). Selection on adaptive and  
751 maladaptive gene expression plasticity during thermal adaptation to urban heat islands.  
752 *Nature Communications*, 12, 6195.
- 753 Campbell-Staton, S.C., Winchell, K.M., Rochette, N.C., Fredette, J., Maayan, I., Schweizer,  
754 R.M., *et al.* (2020). Parallel selection on thermal physiology facilitates repeated  
755 adaptation of city lizards to urban heat islands. *Nature Ecology & Evolution*, 4, 652–  
756 658.
- 757 Capilla-Lasheras, P., Dominoni, D.M., Babayan, S.A., O’Shaughnessy, P.J., Mladenova, M.,  
758 Woodford, L., *et al.* (2017). Elevated Immune Gene Expression Is Associated with Poor  
759 Reproductive Success of Urban Blue Tits. *Frontiers in Ecology and Evolution*, 5, 64.
- 760 Cardilini, A.P.A., Weston, M.A., Nimmo, D.G., Dann, P. & Sherman, C.D.H. (2013). Surviving  
761 in sprawling suburbs: Suburban environments represent high quality breeding habitat  
762 for a widespread shorebird. *Landscape and Urban Planning*, 115, 72–80.
- 763 Chamberlain, D.E., Cannon, A.R., Toms, M.P. & Leech, D.I. (2009). Avian productivity in  
764 urban landscapes : a review and meta-analysis. *Ibis*, 151, 1–18.
- 765 Chao, A., Chiu, C. & Jost, L. (2014). Unifying Species Diversity, Phylogenetic Diversity,  
766 Functional Diversity, and Related Similarity and Differentiation Measures Through Hill  
767 Numbers. *Annual Review of Ecology, Evolution, and Systematics*, 45, 297–324.
- 768 Charter, M., Izhaki, I., Bouskila, A. & Leshem, Y. (2007). Breeding success of the Eurasian  
769 Kestrel (*Falco tinnunculus*) nesting on buildings in Israel. *Journal of Raptor Research*,  
770 41, 139–143.
- 771 Cinar, O., Nakagawa, S. & Viechtbauer, W. (2022). Phylogenetic multilevel meta-analysis: A  
772 simulation study on the importance of modeling the phylogeny. *Methods in Ecology and*  
773 *Evolution*, 13, 383–395.
- 774 Cohen, J.E. & Xu, M. (2015). Random sampling of skewed distributions implies Taylor’s  
775 power law of fluctuation scaling. *Proceedings of the National Academy of Science*, 112,  
776 7749–7754.
- 777 Conway, C.J., Garcia, V., Smith, M.D., Ellis, L.A. & Whitney, J.L. (2006). Comparative  
778 demography of Burrowing Owls in agricultural and urban landscapes in southeastern  
779 Washington. *Journal of Field Ornithology*, 77, 280–290.
- 780 Dhondt, A.A., Eyckerman, R., Moermans, R. & Hublé, J. (1984). Habitat and laying date of  
781 Great and Blue Tit *Parus major* and *P. caeruleus*. *Ibis*, 126, 388–397.

- 782 Diamond, S.E., Chick, L.D., Perez, A., Strickler, S.A. & Martin, R.A. (2018). Evolution of  
783 thermal tolerance and its fitness consequences: parallel and non-parallel responses to  
784 urban heat islands across three cities. *Proceedings of the Royal Society B*, 285,  
785 20180036.
- 786 Diamond, S.E. & Martin, R.A. (2021). Evolution in Cities. *Annual Review of Ecology,  
787 Evolution, and Systematics*, 52, 519–540.
- 788 Dominoni, D., Quetting, M. & Partecke, J. (2013). Artificial light at night advances avian  
789 reproductive physiology. *Proceedings of the Royal Society B*, 280, 20123017.
- 790 Dunn, P.O. & Møller, A.P. (2014). Changes in breeding phenology and population size of  
791 birds. *Journal of Animal Ecology*, 83, 729–739.
- 792 Eden, S.F. (1985). The comparative breeding biology of magpies *Pica pica* in an urban and  
793 a rural habitat (Aves: Corvidae). *Journal of Zoology*, 205, 325–334.
- 794 ESA. 3CS Land Cover Product User Guide. (2020).
- 795 ESA. Land Cover CCI Product User Guide. (2017).
- 796 Evans, B.A. & Gawlik, D.E. (2020). Urban food subsidies reduce natural food limitations and  
797 reproductive costs for a wetland bird. *Scientific Reports*, 10, 14021.
- 798 Fugère, V. & Hendry, A.P. (2018). Human influences on the strength of phenotypic selection.  
799 *Proceedings of the National Academy of Science*, 115, 10070–10075.
- 800 Fusco, G. (2001). How many processes are responsible for phenotypic evolution? *Evolution  
801 & Development*, 3, 279–286.
- 802 Fusco, N.A., Pehek, E. & Munshi-South, J. (2021). Urbanization reduces gene flow but not  
803 genetic diversity of stream salamander populations in the New York City metropolitan  
804 area. *Evolutionary Applications*, 14, 99–116.
- 805 Gahbauer, M.A., Bird, D.M., Clark, K.E., French, T., Brauning, D.W. & McMorris, F.A. (2015).  
806 Productivity, mortality, and management of urban peregrine falcons in northeastern  
807 North America. *Journal of Wildlife Management*, 79, 10–19.
- 808 Garant, D., Hadfield, J.D., Kruuk, L.E.B. & Sheldon, B.C. (2008). Stability of genetic variance  
809 and covariance for reproductive characters in the face of climate change in a wild bird  
810 population. *Molecular Ecology*, 17, 179–188.
- 811 Gładalski, M., Bańbura, M., Kaliński, A., Markowski, M., Skwarska, J., Wawrzyniak, J., *et al.*  
812 (2015). Inter-annual and inter-habitat variation in breeding performance of blue tits  
813 (*Cyanistes caeruleus*) in central Poland. *Ornis Fennica*, 92, 34–42.
- 814 Gładalski, M., Bańbura, M., Kaliński, A., Markowski, M., Skwarska, J., Wawrzyniak, J., *et al.*  
815 (2016a). Effects of extreme thermal conditions on plasticity in breeding phenology and  
816 double-broodedness of Great Tits and Blue Tits in central Poland in 2013 and 2014.  
817 *International Journal of Biometeorology*, 60, 1795–1800.
- 818 Gładalski, M., Bańbura, M., Kaliński, A., Markowski, M., Skwarska, J., Wawrzyniak, J., *et al.*  
819 (2016b). Effects of nest characteristics on reproductive performance in Blue Tits  
820 *Cyanistes caeruleus* and Great Tits *Parus major*. *Avian Biology Research*, 9, 37–43.



- 821 Gładalski, M., Bańbura, M., Kaliński, A., Markowski, M., Skwarska, J., Wawrzyniak, J., *et al.*  
822 (2017). Differences in the breeding success of blue tits *Cyanistes caeruleus* between a  
823 forest and an urban area: A long-term study. *Acta Ornithologica*, 52, 59–68.
- 824 Gładalski, M., Kaliński, A., Wawrzyniak, J., Bańbura, M., Markowski, M., Skwarska, J., *et al.*  
825 (2018). Physiological condition of nestling great tits *Parus major* in response to  
826 experimental reduction in nest micro- and macro-parasites. *Conservation Physiology*, 6,  
827 1–9.
- 828 Gorton, A.J., Moeller, D.A. & Tiffin, P. (2018). Little plant, big city: A test of adaptation to  
829 urban environments in common ragweed (*Ambrosia artemisiifolia*). *Proceedings of the*  
830 *Royal Society B*, 285, 20180968.
- 831 Grafen, A. (1989). The phylogenetic regression. *Philosophical Transactions of the Royal*  
832 *society of London*, 326, 119–157.
- 833 Grimm, N.B., Faeth, S.H., Golubiewski, N.E., Redman, C.L., Wu, J., Bai, X., *et al.* (2008).  
834 Global change and the ecology of cities. *Science*, 319, 756–760.
- 835 Gryz, J. & Krauze-Gryz, D. (2018). Influence of habitat urbanisation on time of breeding and  
836 productivity of tawny Owl (*Strix aluco*). *Polish Journal of Ecology*, 66, 153–161.
- 837 Hajdasz, A.C., Otter, K.A., Baldwin, L.K. & Reudink, M.W. (2019). Caterpillar phenology  
838 predicts differences in timing of mountain chickadee breeding in urban and rural  
839 habitats. *Urban Ecosystems*, 22, 1113–1122.
- 840 Halfwerk, W., Blaas, M., Kramer, L., Hijner, N., Trillo, P.A., Bernal, X.E., *et al.* (2019).  
841 Adaptive changes in sexual signalling in response to urbanization. *Nature Ecology and*  
842 *Evolution*, 3, 374–380.
- 843 Hedges, L., Gurevitch, J. & Curtis, P. (1999). The Meta-Analysis of Response Ratios in  
844 Experimental Ecology. *Ecology*, 80, 1150–1156.
- 845 Hedges, L. V. (1981). Distribution theory for Glass's estimator of effect size and related  
846 estimators. *Journal of Educational Statistics*, 6, 107–128.
- 847 Heisler, J.M. & Brazel, A.J. (2018). The urban physical environment: temperature and urban  
848 heat islands. In: *Urban Ecosystem Ecology* (eds. Aitkenhead-Petersn, J. & Volder, A.).  
849 American Society of Agronomy, Crop Science Society of America, Soil Science Society  
850 of America, Madison, pp. 29–56.
- 851 Hendry, A.P., Gotanda, K.M. & Svensson, E.I. (2017). Human influences on evolution, and  
852 the ecological and societal consequences. *Philosophical Transactions of the Royal*  
853 *Society B*, 372, 20160028.
- 854 Hijmans, R.J. (2020). raster: Geographic Data Analysis and Modeling.
- 855 Hill, M.O. (1973). Diversity and Evenness: A Unifying Notation and Its Consequences.  
856 *Ecology*, 54, 427–432.
- 857 Hinchliff, C.E., Smith, S.A., Allman, J.F., Burleigh, J.G., Chaudhary, R., Coghill, L.M., *et al.*  
858 (2015). Synthesis of phylogeny and taxonomy into a comprehensive tree of life.  
859 *Proceedings of the National Academy of Science*, 112, 12764–12769.
- 860 Hinsley, S.A., Hill, R.A., Bellamy, P.E., Harrison, N.M., Speakman, J.R., Wilson, A.K., *et al.*  
861 (2008). Effects of structural and functional habitat gaps on breeding woodland birds:  
862 Working harder for less. *Landscape Ecology*, 23, 615–626.

- 863 Ibáñez-Álamo, J.D. & Soler, M. (2010). Does urbanization affect selective pressures and life-  
864 history strategies in the common blackbird (*Turdus merula* L.)? *Biological Journal of the*  
865 *Linnean Society*, 101, 759–766.
- 866 Isaksson, C. & Andersson, S. (2007). Carotenoid diet and nestling provisioning in urban and  
867 rural great tits *Parus major*. *Journal of Avian Biology*, 38, 564–572.
- 868 Isaksson, C., Johansson, A. & Andersson, S. (2008). Egg yolk carotenoids in relation to  
869 habitat and reproductive investment in the great tit *Parus major*. *Physiological and*  
870 *Biochemical Zoology*, 81, 112–118.
- 871 Jarrett, C., Powell, L.L., McDevitt, H., Helm, B. & Welch, A.J. (2020). Bitter fruits of hard  
872 labour: diet metabarcoding and telemetry reveal that urban songbirds travel further for  
873 lower-quality food. *Oecologia*, 193, 377–388.
- 874 Johnson, M.T.J. & Munshi-South, J. (2017). Evolution of life in urban environments. *Science*,  
875 358, eaam8327.
- 876 Kelleher, K.M. & O'Halloran, J. (2007). Influence of nesting habitat on breeding Song  
877 Thrushes *Turdus philomelos*. *Bird Study*, 54, 221–229.
- 878 Kettel, E.F., Gentle, L.K., Yarnell, R.W. & Quinn, J.L. (2019). Breeding performance of an  
879 apex predator, the peregrine falcon, across urban and rural landscapes. *Urban*  
880 *Ecosystems*, 22, 117–125.
- 881 Kopij, G. (2017). Changes in the number of nesting pairs and breeding success of the White  
882 Stork *Ciconia ciconia* in a large city and a neighbouring rural area in South-West  
883 Poland. *Ornis Hungarica*, 25, 109–115.
- 884 Lambert, M.R., Brans, K.I., Des Roches, S., Donihue, C.M. & Diamond, S.E. (2020).  
885 Adaptive Evolution in Cities: Progress and Misconceptions. *Trends in Ecology and*  
886 *Evolution*, 36, 239–257.
- 887 Lee, S., Lee, H., Jablonski, P.G., Choe, J.C. & Husby, M. (2017). Microbial abundance on  
888 the eggs of a passerine bird and related fitness consequences between urban and rural  
889 habitats. *PLoS ONE*, 12, e0185411.
- 890 Lin, W.L., Lin, S.M., Lin, J.W., Wang, Y. & Tseng, H.Y. (2015). Breeding performance of  
891 Crested Goshawk *Accipiter trivirgatus* in urban and rural environments of Taiwan. *Bird*  
892 *Study*, 62, 177–184.
- 893 De Lisle, S.P., Mäenpää, M.I. & Svensson, E.I. (2022). Phenotypic plasticity is aligned with  
894 phenological adaptation on both micro- and macroevolutionary timescales. *Ecology*  
895 *Letters*, 25, 790–801.
- 896 Liven-Schulman, I., Leshem, Y., Alon, D. & Yom-Tov, Y. (2004). Causes of population  
897 declines of the Lesser Kestrel *Falco naumanni* in Israel. *Ibis*, 146, 145–152.
- 898 Luna, Á., Palma, A., Sanz-Aguilar, A., Tella, J.L. & Carrete, M. (2020). Sex, personality and  
899 conspecific density influence natal dispersal with lifetime fitness consequences in urban  
900 and rural burrowing owls. *PLoS ONE*, 15, 1–17.
- 901 Luo, D., Wan, X., Liu, J. & Tong, T. (2016). Optimally estimating the sample mean from the  
902 sample size, median, mid-range, and/or mid-quartile range. *Statistical Methods in*  
903 *Medical Research*, 27, 1785–1805.



- 904 MCGOWAN, K.J. (2001). Avian Ecology and Conservation in an Urbanizing World. In: *Avian*  
905 *Ecology and Conservation in an Urbanizing World* (eds. Marzluff, J.M., Bowman, R. &  
906 Donnelly, R.). Kluwer Academic Press, New York, pp. 365–381.
- 907 MENNECHEZ, G. & CLERGEAU, P. (2006). Effect of urbanisation on habitat generalists: starlings  
908 not so flexible? *Acta Oecologica*, 30, 182–191.
- 909 MERCKX, T., NIELSEN, M.E., HELIÖLÄ, J., KUUSSAARI, M., PETTERSSON, L.B., PÖYRY, J., *et al.*  
910 (2021). Urbanization extends flight phenology and leads to local adaptation of seasonal  
911 plasticity in Lepidoptera. *Proceedings of the National Academy of Sciences*, 118,  
912 e2106006118.
- 913 MERCKX, T., SOUFFREAU, C., KAISER, A., BAARDSEN, L.F., BACKELJAU, T., BONTE, D., *et al.* (2018).  
914 Body-size shifts in aquatic and terrestrial urban communities. *Nature*, 558, 113–116.
- 915 MICHONNEAU, F., BROWN, J.W. & WINTER, D.J. (2016). rotl: an R package to interact with the  
916 Open Tree of Life data. *Methods in Ecology and Evolution*, 7, 1476–1481.
- 917 MIDDLETON, A. (1979). Influence of Age and Habitat on Reproduction by the American  
918 Goldfinch. *Ecology*, 60, 418–432.
- 919 MILLSAP, B., BREEN, T., MCCONNELL, E., STEFFER, T., PHILLIPS, L., DOUGLASS, N., *et al.* (2004).  
920 Comparative Fecundity and Survival of Bald Eagles Fledged from Suburban and Rural  
921 Natal Areas in Florida. *Journal of Wildlife Management*, 68, 1018–1031.
- 922 MINIAS, P. (2016). Reproduction and survival in the city: Which fitness components drive  
923 urban colonization in a reed-nesting waterbird? *Current Zoology*, 62, 79–87.
- 924 MORRISSEY, C.A., STANTON, D.W.G., TYLER, C.R., PEREIRA, M.G., NEWTON, J., DURANCE, I., *et al.*  
925 (2014). Developmental impairment in eurasian dipper nestlings exposed to urban  
926 stream pollutants. *Environmental Toxicology and Chemistry*, 33, 1315–1323.
- 927 MUÑOZ, M.M., STIMOLA, M.A., ALGAR, A.C., CONOVER, A., RODRIGUEZ, A.J., LANDESTOY, M.A., *et*  
928 *al.* (2014). Evolutionary stasis and lability in thermal physiology in a group of tropical  
929 lizards. *Proceedings of the Royal Society B*, 281, 20132433.
- 930 NAKAGAWA, S., LAGISZ, M., JENNIONS, M.D., KORICHEVA, J., NOBLE, D.W.A., PARKER, T.H., *et al.*  
931 (2022). Methods for testing publication bias in ecological and evolutionary meta-  
932 analyses. *Methods in Ecology and Evolution*, 13, 4–21.
- 933 NAKAGAWA, S., LAGISZ, M., O'DEA, R.E., RUTKOWSKA, J., YANG, Y., NOBLE, D.W.A., *et al.*  
934 (2021). The orchard plot: Cultivating a forest plot for use in ecology, evolution, and  
935 beyond. *Research Synthesis Methods*, 12, 4–12.
- 936 NAKAGAWA, S., POULIN, R., MENGENSEN, K., REINHOLD, K., ENGGVIST, L., LAGISZ, M., *et al.*  
937 (2015). Meta-analysis of variation: Ecological and evolutionary applications and  
938 beyond. *Methods in Ecology and Evolution*, 6, 143–152.
- 939 NAKAGAWA, S. & SANTOS, E.S.A. (2012). Methodological issues and advances in biological  
940 meta-analysis. *Evolutionary Ecology*, 26, 1253–1274.
- 941 NAKAGAWA, S. & SCHIELZETH, H. (2013). A general and simple method for obtaining R<sup>2</sup> from  
942 generalized linear mixed-effects models. *Methods in Ecology and Evolution*, 4, 133–  
943 142.

- 944 Newhouse, M.J., Marra, P.P. & Johnson, L.S. (2008). Reproductive Success of House  
945 Wrens in Suburban and Rural Landscapes. *The Wilson Journal of Ornithology*, 120,  
946 99–104.
- 947 OpenTreeOfLife, Redelings, R., Reyes, L.L.S., Cranston, K.A., Allman, J., Holder, M.T., *et*  
948 *al.* (2019). Open Tree of Life Synthetic Tree.
- 949 Partecke, J., Hegyi, G., Fitze, P.S., Gasparini, J. & Schwabl, H. (2020). Maternal effects and  
950 urbanization: Variation of yolk androgens and immunoglobulin in city and forest  
951 blackbirds. *Ecology and Evolution*, 10, 2213–2224.
- 952 Pavlicev, M., Cheverud, J.M. & Wagner, G.P. (2011). Evolution of adaptive phenotypic  
953 variation patterns by direct selection for evolvability. *Proceedings of the Royal Society*  
954 *B*, 278, 1903–1912.
- 955 Pebesma, E. (2018). Simple Features for R: Standardized Support for Spatial Vector Data.  
956 *The R Journal*, 10, 439–446.
- 957 Perlut, N.G., Bonter, D.N., Ellis, J.C. & Friar, M.S. (2016). Roof-Top Nesting in a Declining  
958 Population of Herring Gulls (*Larus argentatus*) in Portland, Maine, USA. *Waterbirds*, 39,  
959 68–73.
- 960 Pickett, S.T.A., Cadenasso, M.L., Rosi-Marshall, E.J., Belt, K.T., Groffman, P.M., Grove,  
961 J.M., *et al.* (2017). Dynamic heterogeneity: a framework to promote ecological  
962 integration and hypothesis generation in urban systems. *Urban Ecosystems*, 20, 1–14.
- 963 Pollock, C.J., Capilla-Lasheras, P., McGill, R.A.R., Helm, B. & Dominoni, D.M. (2017).  
964 Integrated behavioural and stable isotope data reveal altered diet linked to low breeding  
965 success in urban-dwelling blue tits (*Cyanistes caeruleus*). *Scientific Reports*, 7, 5014.
- 966 Preiszner, B., Papp, S., Pipoly, I., Seress, G., Vincze, E., Liker, A., *et al.* (2017). Problem-  
967 solving performance and reproductive success of great tits in urban and forest habitats.  
968 *Animal Cognition*, 20, 53–63.
- 969 R Core Team. (2022). R: A language and environment for statistical computing. R  
970 Foundation for Statistical Computing, Vienna, Austria.
- 971 Rees, J.A. & Cranston, K. (2017). Automated assembly of a reference taxonomy for  
972 phylogenetic data synthesis. *Biodiversity Data Journal*, 5, e12581.
- 973 Richardson, J.L., Michaelides, S., Combs, M., Djan, M., Bisch, L., Barrett, K., *et al.* (2021).  
974 Dispersal ability predicts spatial genetic structure in native mammals persisting across  
975 an urbanization gradient. *Evolutionary Applications*, 14, 163–177.
- 976 Rollinson, D.J. & Jones, D.N. (2003). Variation in breeding parameters of the Australian  
977 magpie *Gymnorhina tibicen* in suburban and rural environments. *Urban Ecosystems*, 6,  
978 257–269.
- 979 Rosenfield, R.N., Hardin, M.G., Taylor, J., Sobolik, L.E. & Frater, P.N. (2019). Nesting  
980 density and dispersal movements between urban and rural habitats of cooper's Hawks  
981 (*Accipiter cooperii*) in Wisconsin: Are these source or sink habitats? *American Midland*  
982 *Naturalist*, 182, 36–51.
- 983 Rowe, L., Ludwig, D. & Schluter, D. (1994). Time, condition, and the seasonal decline of  
984 avian clutch size. *American Naturalist*, 143, 698–772.

- 985 Salmón, P., Jacobs, A., Ahrén, D., Biard, C., Dingemanse, N.J., Dominoni, D.M., *et al.*  
986 (2021). Continent-wide genomic signatures of adaptation to urbanisation in a songbird  
987 across Europe. *Nature Communications*, 12, 2983.
- 988 Santangelo, J.S., Ness, R.W., Cohan, B., Fitzpatrick, C.R., Innes, S.G., Koch, S., *et al.*  
989 (2022). Global urban environmental change drives adaptation in white clover. *Science*,  
990 375, 1275–1281.
- 991 de Satgé, J., Strubbe, D., Elst, J., De Laet, J., Adriaensen, F. & Matthysen, E. (2019).  
992 Urbanisation lowers great tit *Parus major* breeding success at multiple spatial scales.  
993 *Journal of Avian Biology*, 50, e02108.
- 994 Schmidt, V.K.-H. & Steinbach, J. (1983). Niedriger Bruterfolg der Kohlmeise (*Parus major*) in  
995 städtischen Parks und Friedhöfen. *Journal für Ornithologie*, 124, 81–83.
- 996 Schoech, S.J. & Bowman, R. (2001). Variation in the timing of breeding between suburban  
997 and wildland Florida Scrub-Jays: Do physiologic measures reflect different  
998 environments? In: *Avian Ecology and Conservation in an Urbanizing World* (eds.  
999 Marzluff, J.M., Bowman, R. & Donnelly, R.). Kluwer Academic Press, New York, pp.  
1000 289–306.
- 1001 Schoech, S.J., Bowman, R., Bridge, E.S. & Boughton, R.K. (2007). Baseline and acute  
1002 levels of corticosterone in Florida Scrub-Jays (*Aphelocoma coerulescens*): Effects of  
1003 food supplementation, suburban habitat, and year. *General and Comparative*  
1004 *Endocrinology*, 154, 150–160.
- 1005 Schoech, S.J., Bowman, R. & Reynolds, S.J. (2004). Food supplementation and possible  
1006 mechanisms underlying early breeding in the Florida Scrub-Jay (*Aphelocoma*  
1007 *coerulescens*). *Hormones and Behavior*, 46, 565–573.
- 1008 Schoech, S.J., Bridge, E.S., Boughton, R.K., Reynolds, S.J., Atwell, J.W. & Bowman, R.  
1009 (2008). Food supplementation: A tool to increase reproductive output? A case study in  
1010 the threatened Florida Scrub-Jay. *Biological Conservation*, 141, 162–173.
- 1011 Senior, A.M., Gosby, A.K., Lu, J., Simpson, S.J. & Raubenheimer, D. (2016a). Meta-analysis  
1012 of variance: An illustration comparing the effects of two dietary interventions on  
1013 variability in weight. *Evolution, Medicine and Public Health*, 2016, 244–255.
- 1014 Senior, A.M., Grueber, C.E., Kamiya, T., Lagisz, M., O'Dwyer, K., Santos, E.S.A., *et al.*  
1015 (2016b). Heterogeneity in ecological and evolutionary meta- analyses: its magnitude  
1016 and implications. *Ecology*, 97, 3293–3299.
- 1017 Senior, A.M., Viechtbauer, W. & Nakagawa, S. (2020). Revisiting and expanding the meta-  
1018 analysis of variation: The log coefficient of variation ratio. *Research Synthesis Methods*,  
1019 11, 553–567.
- 1020 Sepp, T., McGraw, K.J., Kaasik, A. & Giraudeau, M. (2018). A review of urban impacts on  
1021 avian life-history evolution: Does city living lead to slower pace of life? *Global Change*  
1022 *Biology*, 24, 1452–1469.
- 1023 Seress, G., Bókony, V., Pipoly, I., Szép, T., Nagy, K. & Liker, A. (2012). Urbanization,  
1024 nestling growth and reproductive success in a moderately declining house sparrow  
1025 population. *Journal of Avian Biology*, 43, 403–414.

- 1026 Seress, G., Hammer, T., Bókony, V., Vincze, E., Preiszner, B., Pipoly, I., *et al.* (2018).  
1027 Impact of urbanization on abundance and phenology of caterpillars and consequences  
1028 for breeding in an insectivorous bird. *Ecological Applications*, 28, 1143–1156.
- 1029 Seress, G., Sándor, K., Evans, K.L. & Liker, A. (2020). Food availability limits avian  
1030 reproduction in the city: An experimental study on great tits *Parus major*. *Journal of*  
1031 *Animal Ecology*, 89, 1570–1580.
- 1032 Sharma, R.C., Bhatt, D. & Sharma, R.K. (2004). Breeding success of the tropical Spotted  
1033 Munia *Lonchura punctulata* in urbanized and forest habitats. *Ornithological Science*, 3,  
1034 113–117.
- 1035 Sheldon, B.C., Kruuk, L.E.B. & Merilä, J. (2003). Natural Selection and Inheritance of  
1036 Breeding Time and Clutch Size in the Collared Flycatcher. *Evolution*, 57, 406–420.
- 1037 Shi, J., Luo, D., Weng, H., Zeng, X., Lin, L., Chu, H., *et al.* (2020). Optimally estimating the  
1038 sample standard deviation from the five-number summary. *Research Synthesis*  
1039 *Methods*, 11, 641–654.
- 1040 Shochat, E., Warren, P.S., Faeth, S.H., McIntyre, N.E. & Hope, D. (2006). From patterns to  
1041 emerging processes in mechanistic urban ecology. *Trends in Ecology and Evolution*,  
1042 21, 186–191.
- 1043 Shustack, D.P. & Rodewald, A.D. (2011). Nest predation reduces benefits to early clutch  
1044 initiation in northern cardinals *Cardinalis cardinalis*. *Journal of Avian Biology*, 42, 204–  
1045 209.
- 1046 Solonen, T. (2001). Breeding of the Great Tit and Blue Tit in urban and rural habitats in  
1047 Southern Finland. *Ornis Fennica*, 78, 49–60.
- 1048 Solonen, T. (2014). Timing of breeding in rural and urban Tawny Owls *Strix aluco* in  
1049 southern Finland: Effects of vole abundance and winter weather. *Journal of*  
1050 *Ornithology*, 155, 27–36.
- 1051 Solonen, T. & Ursin, K.A. (2008). Breeding of Tawny Owls *Strix aluco* in rural and urban  
1052 habitats in southern Finland. *Bird Study*, 55, 216–221.
- 1053 Stout, W.E., Anderson, R.K. & Papp, J.M. (1998). Urban, suburban and rural red-tailed hawk  
1054 nesting habitat and populations in southeast Wisconsin. *Journal of Raptor Research*,  
1055 32, 221–228.
- 1056 Stracey, C.M. & Robinson, S.K. (2012). Are urban habitats ecological traps for a native  
1057 songbird? Season-long productivity, apparent survival, and site fidelity in urban and  
1058 rural habitats. *Journal of Avian Biology*, 43, 50–60.
- 1059 Strubbe, D., Salleh Hudin, N., Teyssier, A., Vantieghem, P., Aerts, J. & Lens, L. (2020).  
1060 Phenotypic signatures of urbanization are scale-dependent: A multi-trait study on a  
1061 classic urban exploiter. *Landscape and Urban Planning*, 197, 103767.
- 1062 Sumasgutner, P., Nemeth, E., Tebb, G., Krenn, H.W. & Gamauf, A. (2014). Hard times in the  
1063 city-attractive nest sites but insufficient food supply lead to low reproduction rates in a  
1064 bird of prey. *Frontiers in Zoology*, 34, 17–31.
- 1065 Thompson, M.J., Capilla-Lasheras, P., Dominoni, D.M., Réale, D. & Charmantier, A. (2022).  
1066 Phenotypic variation in urban environments: mechanisms and implications. *Trends in*  
1067 *Ecology & Evolution*, 37, 171–182.

- 1068 Thornton, M., Todd, I. & Roos, S. (2017). Breeding Success and Productivity of Urban and  
1069 Rural Eurasian Sparrowhawks *Accipiter nisus* in Scotland. *Ecoscience*, 24, 115–116.
- 1070 Trikalinos, T. & Ioannidis, J.P.A. (2005). Assessing the evolution of effect sizes over time. In:  
1071 *Publication Bias in Meta-Analysis* (eds. Rothstein, H., Sutton, A. & Borenstein, M.).  
1072 John Wiley, Chichester, pp. 241–259.
- 1073 Uchida, K., Blakey, R. V., Burger, J.R., Cooper, D.S., Niesner, C.A. & Blumstein, D.T.  
1074 (2021). Urban Biodiversity and the Importance of Scale. *Trends in Ecology and*  
1075 *Evolution*, 36, 123–131.
- 1076 Via, S. & Lande, R. (1985). Genotype-Environment Interaction and the Evolution of  
1077 Phenotypic Plasticity. *Evolution*, 39, 505–522.
- 1078 Viechtbauer, W. (2010). Conducting meta-analyses in R with the metafor. *Journal of*  
1079 *Statistical Software*, 36, 1–48.
- 1080 Wawrzyniak, J., Kaliński, A., Gładalski, M., Bańbura, M., Markowski, M., Skwarska, J., *et al.*  
1081 (2015). Long-Term Variation in Laying Date and Clutch Size of the Great Tit *Parus*  
1082 *major* in Central Poland: A Comparison between Urban Parkland and Deciduous  
1083 Forest. *Ardeola*, 62, 311–322.
- 1084 Welch-Acosta, B.C., Skipper, B.R. & Boal, C.W. (2019). Comparative breeding ecology of  
1085 Mississippi Kites in urban and exurban areas of West Texas. *Journal of Field*  
1086 *Ornithology*, 90, 248–257.
- 1087 Westgate, M.J. (2019). revtools: An R package to support article screening for evidence  
1088 synthesis. *Research Synthesis Methods*, 10, 606–614.
- 1089 Yeh, P.J. & Price, T.D. (2004). Adaptive phenotypic plasticity and the successful colonization  
1090 of a novel environment. *American Naturalist*, 164, 531–542.
- 1091
- 1092



1093 **Tables**

1094

1095 **Table 1. Description of meta-models.** Model IDs are given sequentially from 1 to 10 to  
 1096 facilitate understanding of methods and results. ‘Data’ refers to whether a given model  
 1097 contained data for all traits of interest (‘All traits’) or models were fitted per trait. Moderator  
 1098 ‘Trait’ is a 3-level factor with levels ‘Laying date’, ‘Clutch size’ and ‘Number of fledglings’.  
 1099 ‘Equations’ provide references to the Equations described in the methods section, whereas  
 1100 ‘Details’ gives a brief description of each model Model ID and references to output tables and  
 1101 figures.

| Model ID | Response | Data                    | Moderators                                                               | Equations                               | Details                                                          |
|----------|----------|-------------------------|--------------------------------------------------------------------------|-----------------------------------------|------------------------------------------------------------------|
| 1        | lnRR     | All traits              | Intercept                                                                | -                                       | Overall meta-analysis. Univariate. Table S1. Figure S3.          |
| 2        | lnRR     | All traits              | Trait                                                                    | Equation 1                              | Effect per trait. Trivariate. Tables S2, S3. Figure 2, 3, S4.    |
| 3        | lnCVR    | All traits              | Intercept                                                                | -                                       | Overall meta-analysis Univariate. Table S1. Figure S5.           |
| 4        | lnCVR    | All traits              | Trait                                                                    | Equation 1                              | Effects per trait. Trivariate. Table 2, S4, S5. Figure 2, 3, S4. |
| 5        | lnCVR    | All traits              | Trait                                                                    | Equation 1                              | Comparison of intra-annual phenotypic variation. Table 2.        |
| 6        | lnCVR    | All traits              | Trait                                                                    | Equation 1, 7, 8                        | Comparison of inter-annual phenotypic. Table 2.                  |
| 7        | lnCVR    | All traits              | Trait + Difference in urbanisation + Difference in habitat heterogeneity | Equation 1 (with additional moderators) | Trivariate. Fitted for different spatial scales. Figure 4.       |
| 8        | SDHM     | All traits              | Trait                                                                    | Equation 1                              | Similar structure as Model 2.                                    |
| 9        | lnVR     | All traits              | Trait                                                                    | Equation 1                              | Similar structure as Model 4.                                    |
| 10       | lnSD     | Each trait individually | Intercept + Habitat + lnMean                                             | Equation 9                              | Armed-based model (Senior <i>et al.</i> 2016a).                  |

1102

1103 **Table 2. Differences in variation (InCVR) in life-history traits between urban and non-**  
 1104 **urban populations at different temporal scales.** Urban – non-urban differences in variation  
 1105 (InCVR) in laying date, clutch size and number of fledglings per clutch were meta-analysed to  
 1106 assess differences in variation between urban and non-urban populations within (‘intra-  
 1107 annual’) and among (‘inter-annual’) breeding seasons (e.g., different temporal scales). InCVR  
 1108 estimates represent meta-analytic model intercepts following the model structure presented  
 1109 in Table S5; positive values indicate higher variation in urban populations than in non-urban  
 1110 populations and *vice versa*. ‘CI’ = confidence interval; ‘k’ = sample size. Terms in **italic bold**  
 1111 highlight InCVR estimates whose 95%CIs do not overlap zero. See Table 1 for a description  
 1112 of model IDs.

| Temporal scale                          | InCVR estimate [95% CI]                             |                          |                           | k   |
|-----------------------------------------|-----------------------------------------------------|--------------------------|---------------------------|-----|
|                                         | Laying date                                         | Clutch size              | Number of fledglings      |     |
| <b>Overall</b><br><b>[Model 4]</b>      | <b><i>0.176</i></b><br><b><i>[0.084, 0.268]</i></b> | 0.055<br>[-0.051, 0.160] | 0.037<br>[-0.096, 0.171]  | 399 |
| <b>Intra-annual</b><br><b>[Model 5]</b> | <b><i>0.177</i></b><br><b><i>[0.078, 0.282]</i></b> | 0.015<br>[-0.122, 0.152] | 0.116<br>[-0.059, 0.291]  | 363 |
| <b>Inter-annual</b><br><b>[Model 6]</b> | 0.074<br>[-0.014, 0.161]                            | 0.096<br>[-0.019, 0.211] | -0.006<br>[-0.147, 0.135] | 103 |

1113

1114 **Figures**

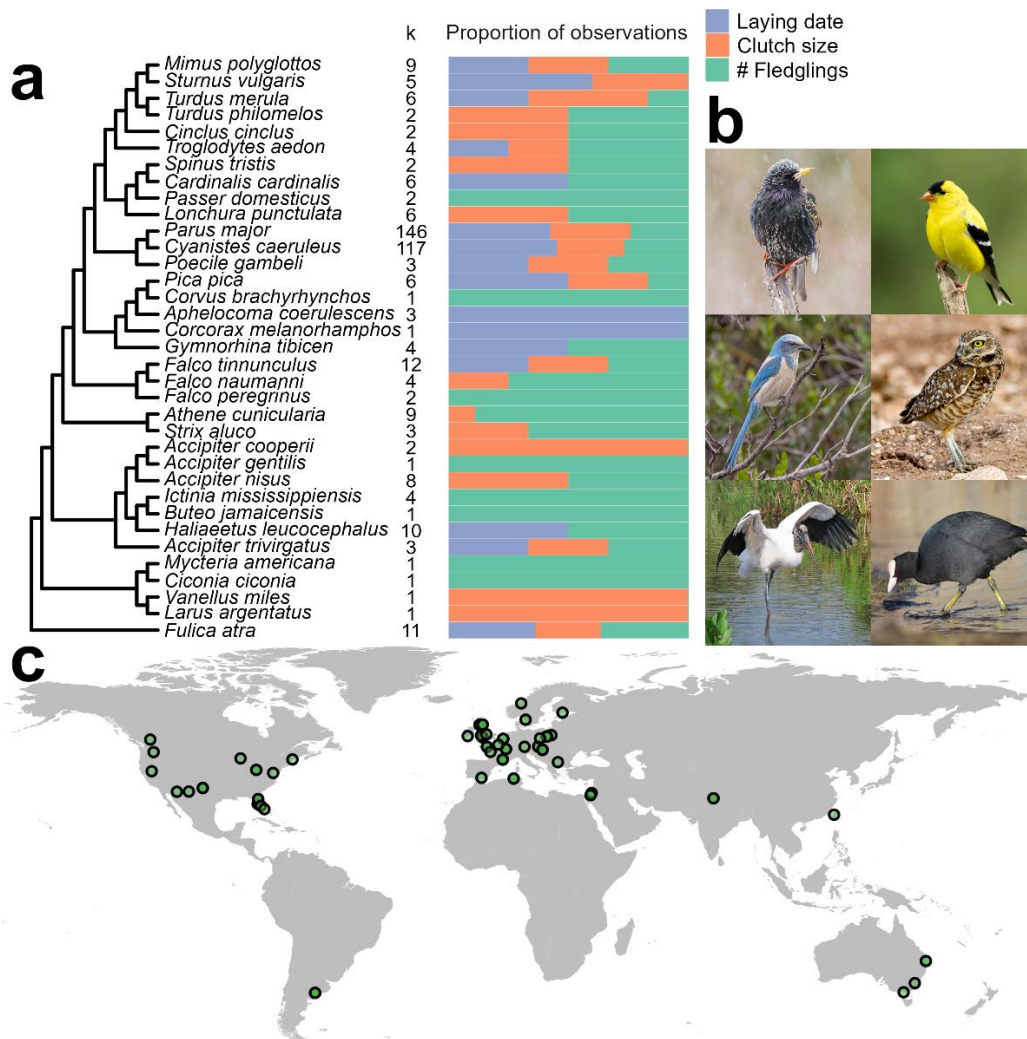

1115

1116 **Figure 1. Phylogenetic and geographical breadth of the meta-analytic data. (a)**

1117 Phylogenetic tree of the 35 avian species included in the meta-analysis along with the number

1118 of effect sizes (i.e., urban – non-urban comparisons) included per species ('k'; which may

1119 encompass multiple years of study from the same publication) and the proportion of

1120 observations for each life-history trait (purple: Laying date; orange: Clutch size; Green:

1121 Number of fledglings). (b) Our meta-analysis included a broad range of species, as examples,

1122 left to right from top to bottom: *Sturnus vulgaris*, *Spinus tristis*, *Aphelocoma coerulescens*,

1123 *Athene cunicularia*, *Mycteria americana* and *Fulica atra*. All images are copyright free (CC -

1124 Public Domain Mark 1.0. Authors: Shenandoah National Park [first two images], Mike

1125 Carlo/U.S. Fish & Wildlife Service, Jennifer Soos, Susan Young and Ekaterina Chernetsova)

1126 and were extracted from [www.flickr.com](http://www.flickr.com). (c) Global map (excluding Antarctica) showing the

1127 location of each study included in the meta-analysis. Each point represents one study area in

1128 which one or more urban – non-urban pairs of populations were sampled across a varying

1129 number of years.



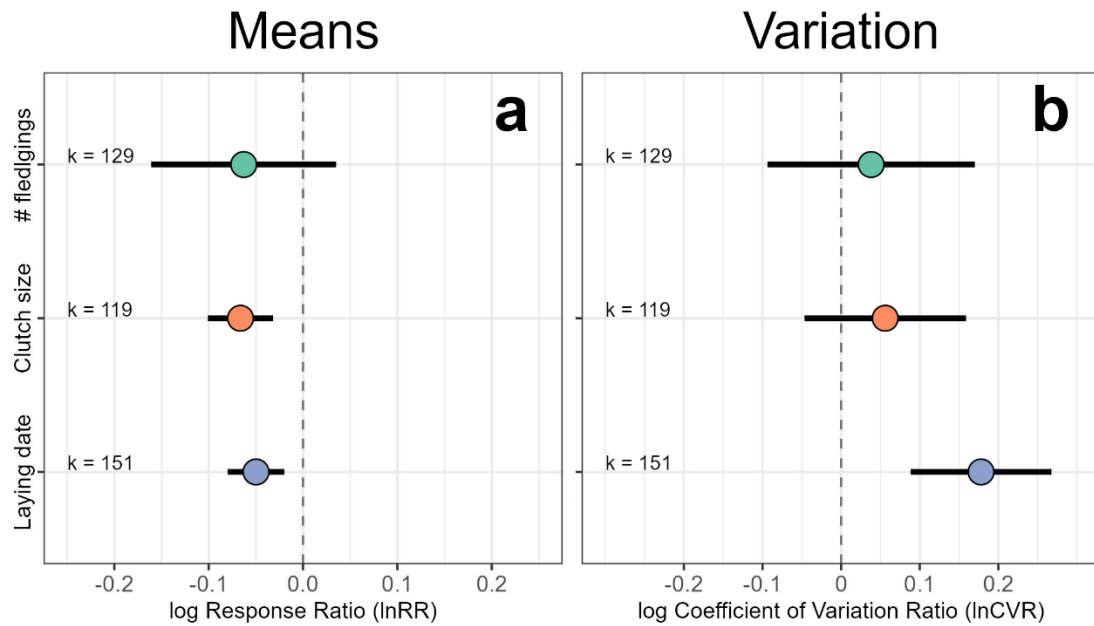

1130

1131 **Figure 2. Urban populations have earlier phenology, lower reproductive output and**

1132 **more variable life-history traits than non-urban populations. (a)** Urban populations laid

1133 earlier and had smaller clutches, producing fewer fledglings, than their paired non-urban

1134 populations (illustrated by negative lnRR estimates; Model 2). **(b)** Our meta-analysis revealed

1135 that variation in life-history traits was higher in urban populations compared to non-urban

1136 counterparts, with a marked difference between populations in laying date (illustrated by

1137 positive estimates of lnCVR; Model 4). Model estimates for **(a)** lnRR and **(b)** lnCVR are shown

1138 along with their 95% confidence intervals per trait as calculated by our phylogenetic multilevel

1139 meta-analytic models accounting for correlated responses to urbanisation among traits (see

1140 Table S3 & Table S5 for full model outputs and Figure S3 and S5 for overall meta-analyses of

1141 lnRR and lnCVR). Raw data and model estimates are presented in Figure S4. 'k' provides the

1142 number of urban – non-urban comparisons.

1143

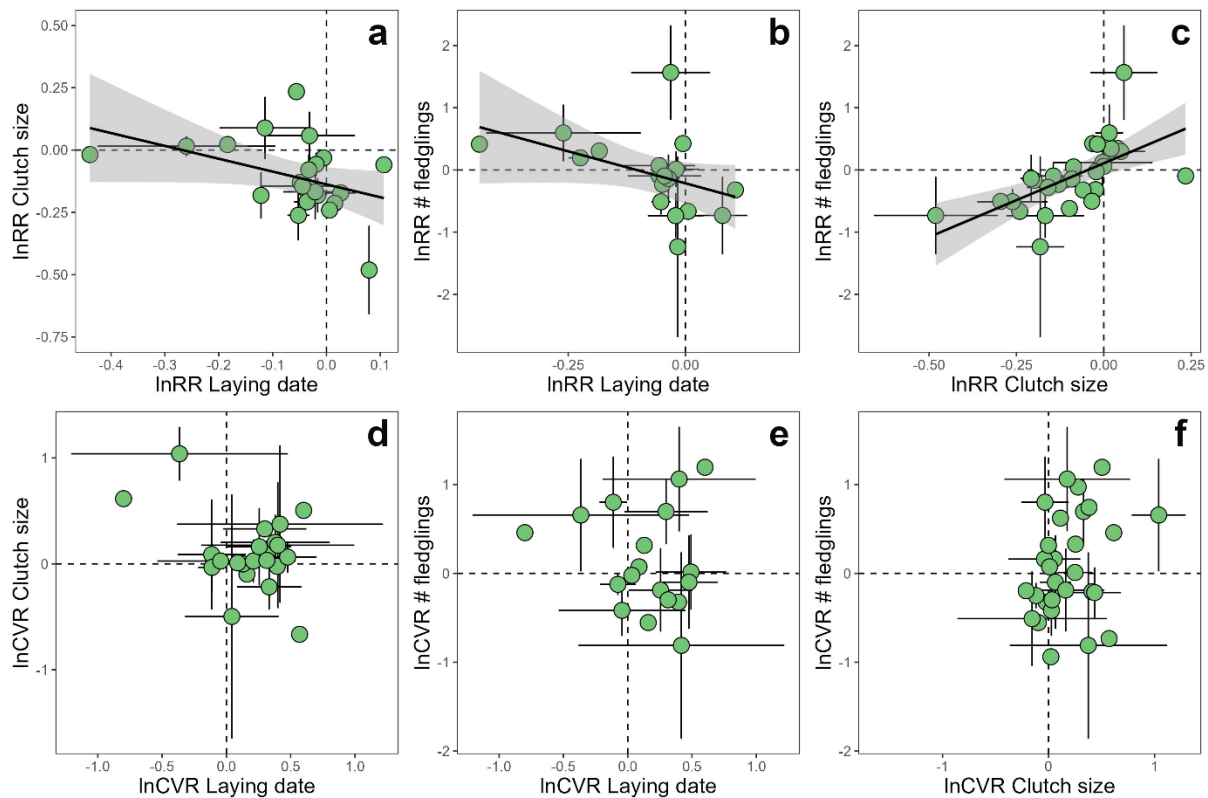

1144

1145 **Figure 3. Life-history traits show a correlated response to urbanisation.** Our meta-  
1146 analysis investigated correlated responses to urbanisation across the three studied life-history  
1147 traits, and revealed strong correlations in log response ratio (InRR) but not log coefficient of  
1148 variation ratio (InCVR). (a) Earlier laying dates in urban populations compared to non-urban  
1149 counterparts (i.e., negative values in the x axis) were associated with no differences in clutch  
1150 size across habitats (i.e., y axis values close to zero), leading to a negative correlation  
1151 between InRR for these two traits. (b) A similar pattern was found between InRR for laying  
1152 dates and number of fledglings, while (c) InRR for clutch size and number of fledglings were  
1153 positively correlated (Table S2; Table S3; Model 2). (d - f) We found no strong statistical  
1154 evidence for models including correlations across traits in how urbanisation affected  
1155 phenotypic variation (Table S4, Table S5): (d) differences between habitats in phenotypic  
1156 variation in laying dates were not associated with differences between habitats in phenotypic  
1157 variation in clutch size or (e) number of fledglings; and (f) differences between habitats in  
1158 variation in clutch size were not associated with differences between habitats in variation in  
1159 number of fledglings. Points represent mean raw values per study  $\pm$  SE. Regression lines  
1160 (mean  $\pm$  SE) in a - c were fitted using linear regressions to illustrate the correlation revealed  
1161 by our trivariate meta-analysis (Model 2; Table S3).

1162

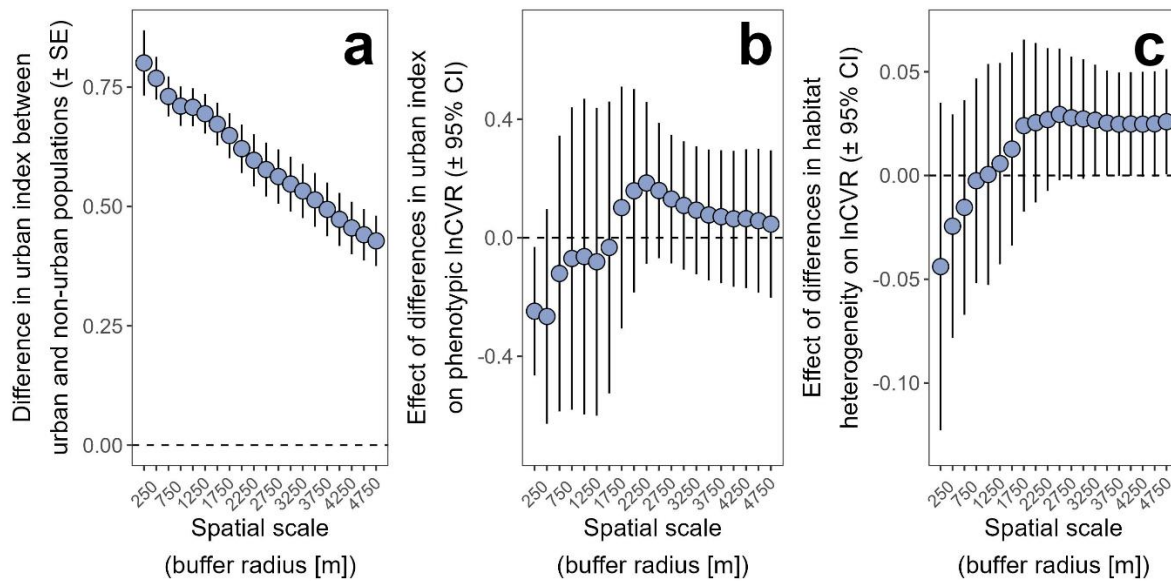

1163

1164 **Figure 4. Effects of habitat heterogeneity on the difference in phenotypic variation**

1165 **between urban and non-urban bird populations (i.e., InCVR). (a)** After quantifying urban

1166 index and habitat heterogeneity, we verified that urban populations had higher urban index

1167 (i.e., the proportion of landcover at a given spatial scale categorised as ‘urban’ [see methods]).

1168 The y axis represents the difference in urban index between urban and non-urban populations.

1169 The positive values observed for all comparisons represent that urban populations had higher

1170 urban index than their non-urban neighbours. **(b)** Differences in urban index between urban

1171 and non-urban populations did not predict the magnitude of the difference in phenotypic

1172 variation between populations (i.e., InCVR). This figure shows the estimated effect of

1173 differences in urban index between populations on InCVR. Positive values indicate that the

1174 higher the difference in urban index between urban and non-urban populations, the higher the

1175 InCVR value (i.e., larger values of phenotypic variation in urban populations compared to non-

1176 urban counterparts). **(c)** Differences in habitat heterogeneity between urban and non-urban

1177 populations did positively predict the magnitude of the difference in phenotypic variation

1178 between populations (i.e., InCVR), particularly at large spatial scales. This figure shows the

1179 estimated effect of differences in habitat heterogeneity on InCVR at different spatial scales.

1180 Positive values indicate that the higher the difference in habitat heterogeneity between urban

1181 and non-urban populations, the higher the InCVR value (i.e., larger values of phenotypic

1182 variation in urban populations compared to non-urban counterparts). Points represent mean

1183 model estimates  $\pm$  SE in **a**, and mean model estimates  $\pm$  95% confidence intervals (95%CI) in

1184 **b** and **c**. ‘Spatial scale’ refers to the radius of a circular area centred at each study location

1185 and over which urban index and habitat heterogeneity was calculated.
